# Supplementary material for: Targeting Mammalian 5-Lipoxygenase by Dietary Phenolics as an Anti-Inflammatory Mechanism: A Systematic Review
Source: MDPI journal article supplement (doi:10.3390/ijms22157937), 2021-07-25
Supplement: s1 [file s1]

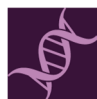

**Table S1.** Modulation of 5-LOX activity and comparison with COX-2 activity by (poly)phenols in cellular models.

1

| Cellular model                                                                                                                                                                | Metabolite and assay conditions                           | Biological activity on 5-LOX and(or) COX-2 and molecular associated events                                                                                                                                                                                                                                                                                                                                                                                                                                                                                                                                                                                                                                                                                                                                                                                                 | Effect on 5-LOX enzyme                                                   | Effect on COX-2 enzyme                    | References |
|-------------------------------------------------------------------------------------------------------------------------------------------------------------------------------|-----------------------------------------------------------|----------------------------------------------------------------------------------------------------------------------------------------------------------------------------------------------------------------------------------------------------------------------------------------------------------------------------------------------------------------------------------------------------------------------------------------------------------------------------------------------------------------------------------------------------------------------------------------------------------------------------------------------------------------------------------------------------------------------------------------------------------------------------------------------------------------------------------------------------------------------------|--------------------------------------------------------------------------|-------------------------------------------|------------|
| Guinea pig isolated leukocytes                                                                                                                                                | NDGA (0.5 – 30 $\mu$ M)                                   | $\downarrow$ LTB <sub>4</sub> , 5-HETE and di-hydroxy acids formation (IC <sub>50</sub> ~ 2 $\mu$ M) in A23187-stimulated cells in a dose-dependent manner                                                                                                                                                                                                                                                                                                                                                                                                                                                                                                                                                                                                                                                                                                                 | Not evaluated                                                            | Not evaluated                             | [1]        |
| Isolated peritoneal mouse macrophages (prelabelled with [ <sup>14</sup> C]-arachidonic acid) and rat neutrophils. Cell-free assays with soybean 15-LOX were also carried out. | Quercetin and NDGA (0.01-100 $\mu$ M).                    | Effects in A23187-stimulated rat neutrophils: $\downarrow$ LTB <sub>4</sub> and 5-HETE formation in cells treated with quercetin (IC <sub>50</sub> = 6.2 $\mu$ M) and NDGA (IC <sub>50</sub> = 1 $\mu$ M); $\downarrow$ PGE <sub>2</sub> and TxB <sub>2</sub> synthesis in cells treated with quercetin (IC <sub>50</sub> = 6.2 and 18.0 $\mu$ M, respectively) and NDGA (IC <sub>50</sub> = 42.0 and 17.6 $\mu$ M, respectively).<br>Effects in zymosan-stimulated mouse macrophages: $\downarrow$ PGE <sub>2</sub> and 6-Keto-PGF <sub>1<math>\alpha</math></sub> formation in cells treated with quercetin (IC <sub>50</sub> = 8.2 and 8.5 $\mu$ M, respectively) and NDGA (IC <sub>50</sub> = 2.4 and 4.2 $\mu$ M, respectively).<br>Quercetin and NDGA inhibited soybean 15-LOX activity (IC <sub>50</sub> = 3.2 and 3.6 $\mu$ M, respectively) in a cell-free assay. | Not evaluated.                                                           | Not evaluated.                            | [2]        |
| Mouse mast tumor cells and rat-isolated platelets. Enzymatic assays with 5-LOX and                                                                                            | Caffeic acid and its phenethyl ester (CAPE) isolated from | $\downarrow$ LTC <sub>4</sub> and LTD <sub>4</sub> synthesis (only caffeic acid at 10 and 100 $\mu$ M); $\downarrow$ AA-                                                                                                                                                                                                                                                                                                                                                                                                                                                                                                                                                                                                                                                                                                                                                   | $\downarrow$ 5-LOX activity by caffeic acid (IC <sub>50</sub> = 3.7) and | $\uparrow$ COX-2 activity by caffeic acid | [3]        |

|                                                                                                              |                                                     |                                                                                                                                                                                                                                                                                                                                                                                                      |                                  |                                                                                                                                                               |     |
|--------------------------------------------------------------------------------------------------------------|-----------------------------------------------------|------------------------------------------------------------------------------------------------------------------------------------------------------------------------------------------------------------------------------------------------------------------------------------------------------------------------------------------------------------------------------------------------------|----------------------------------|---------------------------------------------------------------------------------------------------------------------------------------------------------------|-----|
| COX-2 obtained from cloned mastocytoma P-815,2-E-6 cells were also carried out.                              | <i>Artemisia rubripes</i> Nakai (0.1–100 $\mu$ M).  | induced platelet aggregation; $\downarrow$ 12-HETE formation ( $IC_{50}$ = 30 $\mu$ M); no effect on HHT and $TxB_2$ formation at <10 $\mu$ M, but at higher doses (100 $\mu$ M) exerted an inhibitory effect (40% HHT and 80% 12-HETE); no effect on ADP-induced platelet aggregation.                                                                                                              | CAPE ( $IC_{50}$ = 0.48 $\mu$ M) | (64%) and CAPE (188%)                                                                                                                                         |     |
| Human and porcine leukocytes and platelets. COX activity was tested in microsomes from ram vesicular glands. | 6,7,4'-trihydroxyisoflavan (1 $\mu$ M – 1 mM).      | $\downarrow$ 5-HETE, 12-HETE, and $LTB_4$ formation, while sparing the production of HHT (15 $\mu$ M) in activated (human and porcine) leukocytes; $\downarrow$ 12-HETE formation without inhibiting the synthesis of $TxB_2$ and HHT in platelets (at 100 $\mu$ M); $IC_{50}$ values for 12-LOX (human platelets) and 5-LOX (leukocytes) were 22.0 and 1.6 $\mu$ M, respectively.                   | Not evaluated.                   | $\downarrow$ HHT, $PGF_{2\alpha}$ , $PGD_2$ , and $PGE_2$ synthesis in ram seminal vesicle microsomes ( $IC_{50}$ = 200.0 $\mu$ M). Total inhibition at 1 mM. | [4] |
| Human isolated platelets and leukocytes                                                                      | NDGA                                                | $\downarrow$ 5-HETE ( $IC_{50}$ = 0.2 – 0.3 $\mu$ M), $LTB_4$ ( $IC_{50}$ = 0.5 $\mu$ M), $LTC_4$ ( $IC_{50}$ = 0.2 – 0.5 $\mu$ M), $\Delta^6$ -trans- $LTB_4$ ( $IC_{50}$ = 0.2 $\mu$ M), $\omega$ -OH- $LTB_4$ ( $IC_{50}$ = 2 $\mu$ M), 12-HETE ( $IC_{50}$ = 5 – 30 $\mu$ M), 5S,12S-diHETE ( $IC_{50}$ = 0.2 $\mu$ M), 15-HETE ( $IC_{50}$ = 30 $\mu$ M) and HHT ( $IC_{50}$ = 5 – 100 $\mu$ M) | Not evaluated                    | Not evaluated                                                                                                                                                 | [5] |
| Human isolated platelets and leukocytes                                                                      | NDGA (0.1 – 100 $\mu$ M)                            | $\downarrow$ 5-HETE, $LTB_4$ , $LTC_4$ and 12-HETE                                                                                                                                                                                                                                                                                                                                                   | Not evaluated                    | Not evaluated                                                                                                                                                 | [6] |
| Human-isolated PMNL from healthy donors                                                                      | Caffeic acid (1 $\mu$ M) and esculetin (10 $\mu$ M) | $\downarrow$ 5-HPETE and 5-HETE release in Streptolysin 0-stimulated PMNLs.                                                                                                                                                                                                                                                                                                                          | Not evaluated.                   | Not evaluated.                                                                                                                                                | [7] |

|                                                  |                                                                                                                                                                  |                                                                                                                                                                                                                                                                                                                                                                                                                                                                                                                           |                |                |      |
|--------------------------------------------------|------------------------------------------------------------------------------------------------------------------------------------------------------------------|---------------------------------------------------------------------------------------------------------------------------------------------------------------------------------------------------------------------------------------------------------------------------------------------------------------------------------------------------------------------------------------------------------------------------------------------------------------------------------------------------------------------------|----------------|----------------|------|
| <i>Leishmania donovani</i> -infected macrophages | NDGA (3 $\mu$ M)                                                                                                                                                 | $\downarrow$ 5-HETE and 12- or 15-HETE in infected cells                                                                                                                                                                                                                                                                                                                                                                                                                                                                  | Not evaluated  | Not evaluated  | [8]  |
| Human isolated leukocytes                        | NDGA                                                                                                                                                             | $\downarrow$ 5-HETE ( $IC_{50}$ = 0.6 $\mu$ M) and weak effect on PGE <sub>2</sub> formation ( $IC_{50}$ = 119 $\mu$ M) in A23187-stimulated cells                                                                                                                                                                                                                                                                                                                                                                        | Not evaluated  | Not evaluated  | [9]  |
| Human colonic mucosa                             | NDGA (10 $\mu$ g/mL)                                                                                                                                             | $\downarrow$ sulfidopeptide-LTs in A23187-stimulated human colonic mucosa; no significant effect on PGE <sub>2</sub> formation                                                                                                                                                                                                                                                                                                                                                                                            | Not evaluated  | Not evaluated  | [10] |
| Human isolated neutrophils                       | NDGA (10 $\mu$ M)                                                                                                                                                | $\downarrow$ LTB <sub>4</sub> and 5-HETE formation in A23187-stimulated neutrophils; no effect on HHT synthesis                                                                                                                                                                                                                                                                                                                                                                                                           | Not evaluated  | Not evaluated  | [11] |
| Human isolated leukocytes.                       | Gingerdione, [6]-gingerol, and curcumin.                                                                                                                         | $\downarrow$ 5-HETE release by [6]-gingerol (14% at 20 $\mu$ M) as well as by shogaol, capsaicin, gingerdione and curcumin ( $IC_{50}$ = 23, 100, 15.0 and 8.0 $\mu$ M, respectively); $\downarrow$ PGE <sub>2</sub> release ( $IC_{50}$ = 67, 73, 18.0, 68.0 and 52.0 $\mu$ M for shogaol, capsaicin, gingerdione, [6]-gingerol, and curcumin, respectively) in A23187-activated leukocytes.                                                                                                                             | Not evaluated. | Not evaluated. | [12] |
| Human isolated PMNL                              | 3,5-, 4,5-, and 3,4-di-O-caffeoylquinic acid, caffeoylmalic acid, caffeoyltartaric acid, rosmarinic acid, caffeic acid, and chlorogenic acid (1 $\mu$ M – 1 mM). | $\downarrow$ LTB <sub>4</sub> and 5-HETE formation in A23187-stimulated PMNLs ( $IC_{50}$ = 55.6 – 92.5 $\mu$ M and 214 – 918 $\mu$ M for all compounds, respectively); $\downarrow$ 15-HETE formation only in the presence of rosmarinic acid ( $IC_{50}$ = 455 $\mu$ M); $\uparrow$ PGE <sub>2</sub> in the presence of 3,4-di-O-caffeoylquinic acid, caffeic acid, and caffeoylmalic acid; $\downarrow$ HHT in the presence of the compounds tested ( $IC_{50}$ = 80.0 – 90.2 $\mu$ M); chlorogenic acid was inactive. | Not evaluated. | Not evaluated. | [13] |

|                                                |                                                                                 |                                                                                                                                                                                                                                                                                                                                                                                                                                                                                    |                |                |         |
|------------------------------------------------|---------------------------------------------------------------------------------|------------------------------------------------------------------------------------------------------------------------------------------------------------------------------------------------------------------------------------------------------------------------------------------------------------------------------------------------------------------------------------------------------------------------------------------------------------------------------------|----------------|----------------|---------|
| Elicited rat peritoneal leukocytes.            | Hypolaetin-8-glucoside, hypolaetin, and 14 other flavonoids (1 $\mu$ M – 1 mM). | ↓LTB <sub>4</sub> and TxB <sub>2</sub> production in A23187-stimulated leukocytes by various flavonoids. Glycosides were less active than their aglycones (i.e., hypolaetin-8-glucoside/hypolaetin; gossypin/gossypetin; rutin/quercetin; naringin/naringenin), with the exception of naringin/naringenin. The flavonoids that stimulated DNA degradation also showed 5-LOX inhibitory activity, whereas those that lacked capacity to degrade DNA were related to COX inhibition. | Not evaluated. | Not evaluated. | [14,15] |
| Rabbit peritoneal PMNLs                        | Isoliquiritigenin (10 and 30 $\mu$ M).                                          | ↓[ <sup>14</sup> C]5-HETE production in a concentration-dependent manner in A23187-stimulated PMNLs; no inhibitory effect on PLA <sub>2</sub> activity obtained from rabbit platelet sonicates; ↓[ <sup>14</sup> C]12-HETE formation in rabbit platelet sonicates.                                                                                                                                                                                                                 | Not evaluated. | Not evaluated. | [16]    |
| Porcine leukocytes                             | Isoflavonoids such as isoflavans and isoflavones (0.5 – 200 $\mu$ M)            | ↓5-LOX products (5-HETE, 5-HPETE, LTB <sub>4</sub> and stereoisomers of LTB <sub>4</sub> ); structure-activity investigation showed more effective inhibition in the presence of isoflavans                                                                                                                                                                                                                                                                                        | Not evaluated  | Not evaluated  | [17]    |
| Rat peritoneal neutrophils and human platelets | Curcumin (1–50 $\mu$ M).                                                        | ↓LTB <sub>4</sub> synthesis in stimulated (calcium/A23187) rat peritoneal neutrophils (IC <sub>50</sub> = 30 $\mu$ M; NDGA = 0.5 $\mu$ M). ↓COX-1 (IC <sub>50</sub> = 2 $\mu$ M) and 12-LOX activity (30 $\mu$ M) in platelets.                                                                                                                                                                                                                                                    | Not evaluated. | Not evaluated. | [18]    |
| Rat resident peritoneal macrophages.           | Baicalein (1, 10 and 100 $\mu$ M).                                              | ↓LTC <sub>4</sub> synthesis in A23187-stimulated macrophages (IC <sub>50</sub> = 9.5 $\mu$ M)                                                                                                                                                                                                                                                                                                                                                                                      | Not evaluated. | Not evaluated. | [19]    |

|                                         |                                                                                                                                                                                                                                                                                                                                 |                                                                                                                                                                                                                                                                                                                                                                                                                                                                                                                                                                                                                                                                                    |                |                |      |
|-----------------------------------------|---------------------------------------------------------------------------------------------------------------------------------------------------------------------------------------------------------------------------------------------------------------------------------------------------------------------------------|------------------------------------------------------------------------------------------------------------------------------------------------------------------------------------------------------------------------------------------------------------------------------------------------------------------------------------------------------------------------------------------------------------------------------------------------------------------------------------------------------------------------------------------------------------------------------------------------------------------------------------------------------------------------------------|----------------|----------------|------|
| Murine resident peritoneal macrophages. | Genistein (1–100 $\mu$ M).                                                                                                                                                                                                                                                                                                      | ↓PGE <sub>2</sub> production (IC <sub>50</sub> = 20.0 $\mu$ M) in response to zymosan, calcium ionophore A23187, and phorbol myristate acetate (PMA) stimulation; ↓LTC <sub>4</sub> production in response to zymosan and calcium ionophore A23187 (IC <sub>50</sub> = 15.0 and 10.0 $\mu$ M, respectively). These effects were not exerted via inhibition of PLA <sub>2</sub> , COX or LOX enzymes.                                                                                                                                                                                                                                                                               | Not evaluated. | Not evaluated. | [20] |
| Rat peritoneal leukocytes               | Tanetin, fisetin, 3-hydroxy-flavone (1 – 100 $\mu$ M)                                                                                                                                                                                                                                                                           | ↓LTB <sub>4</sub> , TxB <sub>2</sub> and PGE <sub>2</sub> in A23187-stimulated cells in the presence of tanetin (IC <sub>50</sub> = 11 and 6–11 $\mu$ M for 5-LOX and COX-2, respectively), fisetin (IC <sub>50</sub> = 11 and 50 $\mu$ M for 5-LOX and COX-2, respectively) and 3-hydroxyflavone (IC <sub>50</sub> = 80 and 6–8 $\mu$ M for 5-LOX and COX-2, respectively)                                                                                                                                                                                                                                                                                                        | Not evaluated  | Not evaluated  | [21] |
| Human isolated PMNL                     | RSV, piceid, 2,3,4',5-tetrahydroxystilbene-2-O- $\beta$ -glucoside, $\alpha$ -(3,4-dihydroxy-phenyl)-cinnamic acid, $\alpha$ -(3,4-dihydro-xy-phenyl)-3-hydroxycinnamic acid, $\alpha$ -(3,4-dihydro-xy-phenyl)-4-hydroxycinnamic acid, $\alpha$ -(3,4-dihydro-xy-phenyl)-3,4-dihydroxycinnamic acid, 3,3',4-trihydroxystilbene | ↓5-HETE, 5,12-diHETE, 15-HETE, HHT and PGE <sub>2</sub> in A23187-stimulated cells in the presence of RSV (IC <sub>50</sub> = 8.9, 6.7, 275, 4.4, 9.6 $\mu$ M, respectively) and 3,3',4-trihydroxystilbene (IC <sub>50</sub> = 5.9, 0.63, 6.77, 19, 49 $\mu$ M, respectively). Piceid only affected 5-HETE (IC <sub>50</sub> = 267 $\mu$ M) and 5,12-diHETE (IC <sub>50</sub> = 201 $\mu$ M) biosynthesis; no effects observed in the presence of the rest of compounds<br>↓LTC <sub>4</sub> in A23187-stimulated cells in the presence of RSV (IC <sub>50</sub> = 1.37 $\mu$ M) and 3,3',4-trihydroxystilbene (IC <sub>50</sub> = 0.88 $\mu$ M); ↓ $\beta$ -glucuronidase release | Not evaluated  | Not evaluated  | [22] |

|                                                              |                                                                                       |                                                                                                                                                                                                                                                                                                                                                                                                                                                                                                                                                                                                                                 |                                                            |                |      |
|--------------------------------------------------------------|---------------------------------------------------------------------------------------|---------------------------------------------------------------------------------------------------------------------------------------------------------------------------------------------------------------------------------------------------------------------------------------------------------------------------------------------------------------------------------------------------------------------------------------------------------------------------------------------------------------------------------------------------------------------------------------------------------------------------------|------------------------------------------------------------|----------------|------|
|                                                              |                                                                                       | and ↑cAMP concentration in the presence of RSV and 3,3',4-trihydroxystilbene                                                                                                                                                                                                                                                                                                                                                                                                                                                                                                                                                    |                                                            |                |      |
| RBL-1 and RBL-2H3 cells                                      | Honokiol                                                                              | ↓LTB <sub>4</sub> and LTC <sub>4</sub> formation in A23187-stimulated RBL-1 and IgE-treated RBL-2H3 cells; no effect on PLA <sub>2</sub> , LTC <sub>4</sub> synthase and LTA <sub>4</sub> hydrolase activity                                                                                                                                                                                                                                                                                                                                                                                                                    | ↓LTB <sub>4</sub> and LTC <sub>4</sub> in cell-free assays | Not evaluated  | [23] |
| Isolated rat Kupffer cells and human phagocytic liver cells. | Silibinin (10, 25, 100 and 200 µM).                                                   | ↓LTB <sub>4</sub> formation (IC <sub>50</sub> = 15 µM) and no effect on PGE <sub>2</sub> formation in A23187-stimulated Kupffer cells.<br>↓Dose-dependent of O <sub>2</sub> <sup>-</sup> and NO production (IC <sub>50</sub> = 80 µM). No effect on TNF-α formation.<br>↓LTB <sub>4</sub> formation in freshly isolated human phagocytic liver cells (10 and 25 µM).                                                                                                                                                                                                                                                            | Not evaluated.                                             | Not evaluated. | [24] |
| Human platelets, white blood and endothelial cells.          | Silibinin (1–25 µM to determine LOX products and 1–100 µM to determine COX products). | ↓LTB <sub>4</sub> formation (IC <sub>50</sub> = 15 µM) and Cys-LT formation (IC <sub>50</sub> = 14.5 µM) in A23187-stimulated human granulocytes, but no effect on PGE <sub>2</sub> formation.<br>↓PGE <sub>2</sub> formation in LPS-activated human monocytes (IC <sub>50</sub> = 45 µM).<br>↓TxB <sub>2</sub> and 6-keto-PGF <sub>1α</sub> formation (IC <sub>50</sub> = 69 and 52 µM, respectively), in human platelets and A23187-stimulated endothelial cells, respectively.<br>↓Hypochlorite production (IC <sub>50</sub> = 7 µM), but not of O <sub>2</sub> <sup>-</sup> production in PMA-activated human granulocytes. | Not evaluated.                                             | Not evaluated. | [25] |

|                                 |                                                                                                                                                                                                                                                     |                                                                                                                                                                                                                                                                                                                                                                                                              |                                                                                                                                                                                                                                                  |                                                                                                                                                                |      |
|---------------------------------|-----------------------------------------------------------------------------------------------------------------------------------------------------------------------------------------------------------------------------------------------------|--------------------------------------------------------------------------------------------------------------------------------------------------------------------------------------------------------------------------------------------------------------------------------------------------------------------------------------------------------------------------------------------------------------|--------------------------------------------------------------------------------------------------------------------------------------------------------------------------------------------------------------------------------------------------|----------------------------------------------------------------------------------------------------------------------------------------------------------------|------|
| Rat platelets and rat PMNL      | 2-(3,4-Dihydroxyphenyl) ethanol (DPE), 2-(4-Hydroxyphenyl) ethanol, 2-(3,4-dihydroxyphenyl) acetic acid, caffeic acid, protocatechuic acid, <i>p</i> -coumaric acid, <i>o</i> -coumaric acid, vanillic acid, and syringic acid (0.1 $\mu$ M – 1 mM) | $\downarrow$ LTB <sub>4</sub> production in A23187-stimulated PMNLs and 12-HETE production in intact platelets (IC <sub>50</sub> of DPE = 26.0 and 50.0 $\mu$ M, respectively). DPE showed the highest inhibitory (compared with the rest of the compounds) activity against 5- and 12-LOX, especially in intact cells.                                                                                      | $\downarrow$ 5-HETE synthesis (IC <sub>50</sub> of DPE = 13.0) (5-LOX isolated from PMNLs)                                                                                                                                                       | $\downarrow$ 12-HETE synthesis (IC <sub>50</sub> of DPE = 4.2 $\mu$ M), and no effect on TxB <sub>2</sub> synthesis (COX-1 and 12-LOX isolated from platelets) | [26] |
| PMNL from healthy donors.       | Hydroxytyrosol (0.1 $\mu$ M – 1 mM).                                                                                                                                                                                                                | $\downarrow$ LTB <sub>4</sub> production (IC <sub>50</sub> = 1.2 $\mu$ M) and its $\omega$ -oxidized metabolites (20-hydroxy and 20-carboxy-LTB <sub>4</sub> ) in A23187-stimulated PMNLs                                                                                                                                                                                                                    | Not evaluated.                                                                                                                                                                                                                                   | Not evaluated.                                                                                                                                                 | [27] |
| RBL-1 cells                     | YPE-01 (derived from yakuchinones), yakuchinone B, dimethyl-yakuchinone B; NDGA was used a control of 5-LOX inhibition                                                                                                                              | $\downarrow$ LTB <sub>4</sub> and LTC <sub>4</sub> biosynthesis in A23187-treated RBL-1 cells in the presence of YPE-01 (IC <sub>50</sub> = 0.035 and 0.046 $\mu$ M, respectively), yakuchinone B (IC <sub>50</sub> = 0.49 and 0.61 $\mu$ M, respectively), dimethyl-yakuchinone B (IC <sub>50</sub> = 1.14 and 2.11 $\mu$ M, respectively) and NDGA (IC <sub>50</sub> = 0.27 and 0.5 $\mu$ M, respectively) | $\downarrow$ 5-LOX activity by YPE-01 (IC <sub>50</sub> = 0.28 $\mu$ M), yakuchinone B (IC <sub>50</sub> = 0.37 $\mu$ M), dimethyl-yakuchinone B (IC <sub>50</sub> = 0.22 $\mu$ M) and NDGA (IC <sub>50</sub> = 0.49 $\mu$ M) in cell-free assay | $\downarrow$ COX-1 and COX-2 activity by yakuchinone B and dimethyl-yakuchinone B in cell-free assays                                                          | [28] |
| Human PMNL from healthy donors. | <i>trans</i> -RSV (0.44 – 440 $\mu$ M).                                                                                                                                                                                                             | $\downarrow$ LTB <sub>4</sub> , 6- <i>trans</i> - and 12- <i>trans</i> -epi-LTB <sub>4</sub> production in A23187-stimulated PMNLs (IC <sub>50</sub> = 48.2 $\pm$ 7.0 $\mu$ M); formation of 5-LOX-derived metabolites was virtually abolished at 220 $\mu$ M.                                                                                                                                               | Not evaluated.                                                                                                                                                                                                                                   | Not evaluated.                                                                                                                                                 | [29] |
| Bovine PMNL                     | Hyperoside, rutoside, and chlorogenic acid (25 – 100 $\mu$ M).                                                                                                                                                                                      | No effect on LTB <sub>4</sub> or 12(S)-HETE biosynthesis at concentrations $\leq$ 100 $\mu$ M in A23187-stimulated PMNLs.                                                                                                                                                                                                                                                                                    | Not evaluated.                                                                                                                                                                                                                                   | Not evaluated.                                                                                                                                                 | [30] |

|                                                              |                                                  |                                                                                                                                                                                                                                                                                                                                                                                                                                                                                                                                                                                                                                                                                                                                                                        |                                                                                                                                                  |                                                                                 |      |
|--------------------------------------------------------------|--------------------------------------------------|------------------------------------------------------------------------------------------------------------------------------------------------------------------------------------------------------------------------------------------------------------------------------------------------------------------------------------------------------------------------------------------------------------------------------------------------------------------------------------------------------------------------------------------------------------------------------------------------------------------------------------------------------------------------------------------------------------------------------------------------------------------------|--------------------------------------------------------------------------------------------------------------------------------------------------|---------------------------------------------------------------------------------|------|
| Human isolated PMNLs and rat basophilic leukemia cells RBL-1 | Myr-3-glur and NDGA                              | <p>↓LTB<sub>4</sub> formation in A23187-stimulated PMNLs treated with Myr-3-glur for 2 h (IC<sub>50</sub> = 2.2 µM) or with NDGA for 5 min (IC<sub>50</sub> = 0.5 µM); no effect of Myr-3-glur in cells incubated for 5 min.</p> <p>Myr-3-glur inhibited AA-induced platelet aggregation and ↓PGE<sub>2</sub>, PGD<sub>2</sub>, and PGI<sub>2</sub> biosynthesis ex vivo (to a similar extent as indomethacin)</p> <p>↓COX-1 activity obtained from platelets (IC<sub>50</sub> = 0.5 µM) and ram seminal vesicle (IC<sub>50</sub> = 10 µM)</p>                                                                                                                                                                                                                         | <p>↓5-LOX activity in a crude enzyme preparation from RBL-1 (IC<sub>50</sub> = 0.1 µM for Myr-3-glur and IC<sub>50</sub> = 0.26 µM for NDGA)</p> | <p>↓COX-2 activity (IC<sub>50</sub> = 0.26 µM) obtained from sheep placenta</p> | [31] |
| Rat peritoneal leukocytes.                                   | Gnaphalin, quercetin and galangin (20 – 160 µM). | <p>Gnaphalin effects: ↓LTB<sub>4</sub> production in A23187-stimulated rat peritoneal leukocytes (IC<sub>50</sub> = 81.8±12.9 µM; ↓TxB<sub>2</sub> production in rat peritoneal leukocytes stimulated with A23187 (IC<sub>50</sub> = 39.9±3.9 µM), chemotactic peptide fMLP (IC<sub>50</sub> = 12.0 µM) and AA (IC<sub>50</sub> = 57.7±5.1 µM); no effect on the secretion of lysozyme, myeloperoxidase and β-glucuronidase pro-inflammatory enzymes from neutrophil secretory granules; no scavenging effect against hydrogen peroxide or hypochlorous acid.</p> <p>Quercetin effects: inhibition of LTB<sub>4</sub> (100%) and TxB<sub>2</sub> (55%) at 160 µM.</p> <p>Galangin effects: inhibition of LTB<sub>4</sub> (11%) and TxB<sub>2</sub> (84%) at 40 µM.</p> | Not evaluated.                                                                                                                                   | Not evaluated.                                                                  | [32] |
| Rat peritoneal leukocytes.                                   | Oleuropein, tyrosol, hydroxytyrosol, and         | ↓LTB <sub>4</sub> production in A23187-stimulated rat peritoneal leukocytes treated                                                                                                                                                                                                                                                                                                                                                                                                                                                                                                                                                                                                                                                                                    | Not evaluated.                                                                                                                                   | Not evaluated.                                                                  | [33] |



|                                    |                                                                                                                                                                                                       |                                                                                                                                                                                                                                                                                                             |                                                                                                                     |                                                                          |      |
|------------------------------------|-------------------------------------------------------------------------------------------------------------------------------------------------------------------------------------------------------|-------------------------------------------------------------------------------------------------------------------------------------------------------------------------------------------------------------------------------------------------------------------------------------------------------------|---------------------------------------------------------------------------------------------------------------------|--------------------------------------------------------------------------|------|
|                                    | caffeic acid (40, 100 and 200 $\mu$ M).                                                                                                                                                               | with hydroxytyrosol, oleuropein, caffeic acid, and tyrosol ( $IC_{50}$ = 15, 80, 200, and 500 $\mu$ M, respectively); $\downarrow$ ROS production in PMA-stimulated rat leukocytes; no substantial inhibition on TxB <sub>2</sub> exerted by the compounds tested                                           |                                                                                                                     |                                                                          |      |
| Human isolated PMNLs               | 3-methylcatechol, 4-methylcatechol, 4-nitrocatechol, guaiacol, pyrogallol, propylgallate, 1,2,4-trihydroxybenzene, 1,3,5-trihydroxybenzene (1.8 nM – 1800 $\mu$ M)                                    | $\downarrow$ LTB <sub>4</sub> ( $IC_{50}$ = 5 – 900 $\mu$ M) and PGE <sub>2</sub> ( $IC_{50}$ = 45 – 900 $\mu$ M) synthesis in A23187-stimulated cells (at concentrations higher than 18 $\mu$ M); 1,3,5-trihydroxybenzene exerted no inhibition on LTB <sub>4</sub> formation ( $IC_{50}$ >> 1800 $\mu$ M) | Not evaluated                                                                                                       | Not evaluated                                                            | [34] |
| Human erythroleukemia K562 cells.  | RSV (30 $\mu$ M).                                                                                                                                                                                     | $\downarrow$ LTB <sub>4</sub> and PGE <sub>2</sub> synthesis in H <sub>2</sub> O <sub>2</sub> -treated K562 cells; $\downarrow$ purified 15-LOX ( $IC_{50}$ = 25.0 $\pm$ 3.0 $\mu$ M) activity.                                                                                                             | $\downarrow$ purified 5-LOX ( $IC_{50}$ = 2.5 $\pm$ 0.3 $\mu$ M) activity.                                          | $\downarrow$ PGH synthase ( $IC_{50}$ = 20.0 $\pm$ 2.0 $\mu$ M) activity | [35] |
| Rat isolated peritoneal leukocytes | 6-hydroxy-kaempferol 3,6-dimethyl ether; 6-hydroxy-kaempferol 3,6,4'-trimethyl ether; quercetagenin 3,6,3'-trimethyl ether; 6-hydroxy-luteolin 6-methyl ether; 6-hydroxy-luteolin 6,3'-dimethyl ether | $\downarrow$ TxB <sub>2</sub> ( $IC_{50}$ = 22 – 182 $\mu$ M) and LTB <sub>4</sub> ( $IC_{50}$ = 58 – 182 $\mu$ M) biosynthesis in A23187-stimulated cells                                                                                                                                                  | Not evaluated                                                                                                       | Not evaluated                                                            | [36] |
| RBL-2H3                            | Magnolol (0.1 – 20 $\mu$ M)                                                                                                                                                                           | $\downarrow$ LTB <sub>4</sub> and LTC <sub>4</sub> formation (at 10 and 20 $\mu$ M); no effect on IgE-induced $\beta$ -hexosaminidase release; $\downarrow$ AA release at 10 $\mu$ M; $\downarrow$ [Ca <sup>+2</sup> ] release in IgE-treated cells                                                         | $\downarrow$ LTB <sub>4</sub> and LTC <sub>4</sub> (using AA or LTA <sub>4</sub> as substrates) formation at 10 and | Not evaluated                                                            | [37] |

|                                                                                       |                                           |                                                                                                                                                                                                                                                                                                                                                                                                                                                                                                                                                                                                                                                                                                                                                                                                      | 25 $\mu$ M in cell-free assays                                                                                                                                                     |                                                                                                                                                                     |      |
|---------------------------------------------------------------------------------------|-------------------------------------------|------------------------------------------------------------------------------------------------------------------------------------------------------------------------------------------------------------------------------------------------------------------------------------------------------------------------------------------------------------------------------------------------------------------------------------------------------------------------------------------------------------------------------------------------------------------------------------------------------------------------------------------------------------------------------------------------------------------------------------------------------------------------------------------------------|------------------------------------------------------------------------------------------------------------------------------------------------------------------------------------|---------------------------------------------------------------------------------------------------------------------------------------------------------------------|------|
| Monocytic leukemia cells MM6, human platelets and PMNLs isolated from healthy donors. | Hyperforin (0.1 – 100 $\mu$ M).           | <p><math>\downarrow</math>LTB<sub>4</sub> and 15-HETE formation in A23187-stimulated PMNLs (IC<sub>50</sub> = 1.0-2.0 and &gt;10 <math>\mu</math>M, respectively); <math>\downarrow</math>HHT production in thrombin- or A23187- and exogenous AA-stimulated human platelets (IC<sub>50</sub> = 0.3, 3.0 and 3.0 <math>\mu</math>M, respectively) as well as in platelet lysates (IC<sub>50</sub> = 3 <math>\mu</math>M).</p> <p>Hyperforin could not interfere with COX-2 product formation (6-keto-PGF<sub>1<math>\alpha</math></sub>) in MM6 cells; and did not significantly inhibit 12-LOX or 15-LOX in intact platelets or leukocytes, respectively.</p>                                                                                                                                       | $\downarrow$ purified 5-LOX (IC <sub>50</sub> = 90 nM) activity acting via uncompetitive mechanisms.                                                                               | Not evaluated.                                                                                                                                                      | [38] |
| Rat peritoneal leukocytes                                                             | Erycristagallin ( $\leq$ 100 $\mu$ M)     | $\downarrow$ LTB <sub>4</sub> formation in A23187-stimulated leukocytes (IC <sub>50</sub> = 23.4 $\mu$ M) without cytotoxic effects; no effect on COX-1 from platelets at 100 $\mu$ M                                                                                                                                                                                                                                                                                                                                                                                                                                                                                                                                                                                                                | Not evaluated.                                                                                                                                                                     | Not evaluated.                                                                                                                                                      | [39] |
| RAW264.7 macrophages and HT-29 human colon cancer cells.                              | Curcumin and THC (10, 20 and 50 $\mu$ M). | <p><math>\downarrow</math>LTB<sub>4</sub> and PGE<sub>2</sub> formation as well as AA release in LPS-stimulated RAW264.7 cells at 10 <math>\mu</math>M; <math>\downarrow</math>AA release in A23187-stimulated HT-29 cells at 10 <math>\mu</math>M; <math>\downarrow</math>cPLA<sub>2</sub> activity from microsomal fraction of HT-29 cells; <math>\downarrow</math>cPLA<sub>2</sub> level and cPLA<sub>2</sub> phosphorylation in LPS-treated RAW264.7 cells at 50 <math>\mu</math>M; <math>\downarrow</math>PGF<sub>2<math>\alpha</math></sub>, PGE<sub>2</sub>, PGD<sub>2</sub>, HHT, 15-HETE and 11-HETE in LPS-stimulated RAW264.7 cell lysates treated with 0THC at 50 <math>\mu</math>M; at the same concentration curcumin reduced the biosynthesis of PGD<sub>2</sub>, 15-HETE and 11-</p> | <p><math>\downarrow</math>Human recombinant 5-LOX expression in LPS-treated RAW264.7 cells (IC<sub>50</sub> = 0.7 and 3 <math>\mu</math>M for curcumin and THC, respectively).</p> | <p><math>\downarrow</math>COX-2 expression in LPS-treated RAW264.7 cells (curcumin at 20 <math>\mu</math>M), but increase COX-2 levels without LPS stimulation.</p> | [40] |

|                                |                                                                    |                                                                                                                                                                                                                                                                                                                                                                                                                                                                                                                                                                                                         |                                                                                                                    |                                                                                      |      |
|--------------------------------|--------------------------------------------------------------------|---------------------------------------------------------------------------------------------------------------------------------------------------------------------------------------------------------------------------------------------------------------------------------------------------------------------------------------------------------------------------------------------------------------------------------------------------------------------------------------------------------------------------------------------------------------------------------------------------------|--------------------------------------------------------------------------------------------------------------------|--------------------------------------------------------------------------------------|------|
|                                |                                                                    | HETE; higher inhibitory effect on the peroxidase activity of COX-1 than that of COX-2                                                                                                                                                                                                                                                                                                                                                                                                                                                                                                                   |                                                                                                                    |                                                                                      |      |
| Rat peritoneal leukocytes.     | Sigmoidin A and sigmoidin B (5 – 100 $\mu$ M).                     | ↓LTB <sub>4</sub> in calcium/A23187- stimulated rat peritoneal leukocytes treated with sigmoidin A (IC <sub>50</sub> = 31 $\mu$ M), sigmoidin B (44% inhibition at the same concentration); apigenin used as reference compound also showed inhibitory activity (IC <sub>50</sub> = 14 $\mu$ M).<br>No inhibition of COX-1 activity; no reduction of 12-HHT synthesis at 100 $\mu$ M of both compounds.                                                                                                                                                                                                 | Not evaluated.                                                                                                     | Not evaluated.                                                                       | [41] |
| PMNLs from healthy donors.     | Curcumin, eugenol, cinnamaldehyde and quercetin (1 – 150 $\mu$ M). | ↓5-HETE production in PMNLs (IC <sub>50</sub> = 30.0, 26.0, 35.0 and 25.0 $\mu$ M for curcumin, eugenol, cinnamaldehyde and quercetin, respectively); NDGA (IC <sub>50</sub> = 28.0 $\mu$ M).                                                                                                                                                                                                                                                                                                                                                                                                           | Not evaluated.                                                                                                     | Not evaluated.                                                                       | [42] |
| Neutrophils isolated from rats | Magnolol (0.1 – 10 $\mu$ M)                                        | ↓COX products formation, but low effect on 5-LOX products biosynthesis at 3 $\mu$ M; Inhibition of COX and 5-LOX products production at 10 $\mu$ M; ↓TxB <sub>2</sub> formation (IC <sub>50</sub> = 0.5 $\mu$ M); ↑LTB <sub>4</sub> biosynthesis at concentrations <3 $\mu$ M, but inhibition at higher concentrations; Magnolol alone modified 5-LOX distribution in the cells, ↑AA release (PLA <sub>2</sub> activity), ↑cPLA <sub>2</sub> translocation and phosphorylation (effects dose-dependent) and had no effect on MAPK phosphorylation. These effects were absent in the presence of A23187. | ↓COX-1 and COX-2 activity (IC <sub>50</sub> = 26.0 ± 1.9 and 31.2 ± 2.8 $\mu$ M, respectively) in cell-free assays | Weak inhibition of 5-LOX activity (IC <sub>50</sub> ~ 90 $\mu$ M) in cell-free assay | [43] |

|                                                      |                                                                                                                                                                          |                                                                                                                                                                                                                                                                                                                                                         |                                                                           |                                                                                                                                                                         |      |
|------------------------------------------------------|--------------------------------------------------------------------------------------------------------------------------------------------------------------------------|---------------------------------------------------------------------------------------------------------------------------------------------------------------------------------------------------------------------------------------------------------------------------------------------------------------------------------------------------------|---------------------------------------------------------------------------|-------------------------------------------------------------------------------------------------------------------------------------------------------------------------|------|
| BMMC cells                                           | Ginkgetin (1 – 50 $\mu$ M).                                                                                                                                              | $\downarrow$ LTC <sub>4</sub> in BMMC activated with KL (100 ng/ml) (IC <sub>50</sub> = 0.33 $\mu$ M);<br>$\downarrow$ PGD <sub>2</sub> in BMMC activated with KL (100 ng/ml), IL-10 (100 U/ml) and LPS (100 ng/ml) (IC <sub>50</sub> = 0.75 $\mu$ M); $\downarrow$ degranulation reaction in a dose dependent manner (IC <sub>50</sub> = 6.52 $\mu$ M) | Not evaluated.                                                            | $\downarrow$ COX-2 protein level.                                                                                                                                       | [44] |
| Rat peritoneal neutrophils and RAW 264.7 macrophages | 5-O-demethylnobiletin (0.01 – 10 $\mu$ M)                                                                                                                                | $\downarrow$ LTB <sub>4</sub> formation in rat neutrophils (IC <sub>50</sub> = 0.35 $\mu$ M)                                                                                                                                                                                                                                                            | $\downarrow$ 5-LOX activity (cell lysate) by 57% at 0.25 $\mu$ M          | $\downarrow$ COX-2 expression RAW cells (5-20% inhibition)                                                                                                              | [45] |
| Human monocyte line U937.                            | Procyanidin B <sub>2</sub> (50 and 100 $\mu$ M).                                                                                                                         | $\downarrow$ LOX-1 protein and mRNA levels in ox-LDL treated macrophages.                                                                                                                                                                                                                                                                               | $\downarrow$ 5-LOX protein and mRNA levels in ox-LDL treated macrophages. | Not evaluated.                                                                                                                                                          | [46] |
| BMMC                                                 | Five coumarins (psoralen, xanthotoxin, scopoletin, umbelliferone, and (+)-marmesin) and three flavonoids (apigenin, luteolin and cynaroside) (12.5 and 25.0 $\mu$ g/mL). | $\downarrow$ LTC <sub>4</sub> production in BMMC activated with KL (100 ng/ml) at 25.0 $\mu$ g/mL; $\downarrow$ PGD <sub>2</sub> formation in BMMC activated with KL (100 ng/ml), IL-10 (100 U/ml) and LPS (100 ng/ml) at 12.5 $\mu$ g/mL. All compounds showed COX-2/5-LOX dual inhibitory activity.                                                   | Not evaluated.                                                            | Not evaluated.                                                                                                                                                          | [47] |
| BMMC cells                                           | Methyl gallate (5 – 160 $\mu$ M).                                                                                                                                        | $\downarrow$ LTC <sub>4</sub> (IC <sub>50</sub> = 5.3 $\mu$ M) in BMMC activated with KL (100 ng/ml).<br>$\downarrow$ PGD <sub>2</sub> (IC <sub>50</sub> = 17.0 $\mu$ M) in BMMC activated with KL (100 ng/ml), IL-10 (100 U/ml) and LPS (100 ng/ml).                                                                                                   | Not evaluated.                                                            | $\downarrow$ COX-2 activity (colorimetric COX inhibitor screening assay kit) (IC <sub>50</sub> = 19.0 $\mu$ M); no effect on COX-2 protein levels at $\leq$ 80 $\mu$ M. | [48] |
| BMMC cells                                           | Ochnaflavone (1.5 – 50 $\mu$ M).                                                                                                                                         | $\downarrow$ LTC <sub>4</sub> (IC <sub>50</sub> = 6.5 $\mu$ M) in BMMC activated with KL (100 ng/ml).                                                                                                                                                                                                                                                   | Not evaluated.                                                            | $\downarrow$ COX-2 protein levels.                                                                                                                                      | [49] |

|                                                                     |                                                                                       |                                                                                                                                                                                                                                                                                                                                                                                                                                                                                                                                 |                                                                                                                      |                                    |      |
|---------------------------------------------------------------------|---------------------------------------------------------------------------------------|---------------------------------------------------------------------------------------------------------------------------------------------------------------------------------------------------------------------------------------------------------------------------------------------------------------------------------------------------------------------------------------------------------------------------------------------------------------------------------------------------------------------------------|----------------------------------------------------------------------------------------------------------------------|------------------------------------|------|
|                                                                     |                                                                                       | ↓PGD <sub>2</sub> (IC <sub>50</sub> = 0.6 µM) in BMMC activated with KL (100 ng/ml), IL-10 (100 U/ml) and LPS (100 ng/ml); ↓Degranulation reaction in a dose dependent manner (IC <sub>50</sub> = 3.0 µM).                                                                                                                                                                                                                                                                                                                      |                                                                                                                      |                                    |      |
| PMNLs from healthy donors.                                          | Eugenol (5 – 60 µM).                                                                  | ↓LTC <sub>4</sub> and 5-HETE in A23187- and AA-stimulated PMNLs (IC <sub>50</sub> = 30.0 and 26.0 µM, respectively).                                                                                                                                                                                                                                                                                                                                                                                                            | Not evaluated.                                                                                                       | Not evaluated.                     | [50] |
| Human peripheral blood eosinophils                                  | Genistein (1nM – 10 µM)                                                               | ↓LTC <sub>4</sub> in A23187-stimulated cells (IC <sub>50</sub> = 80 nM); ↓p38 and MK2 phosphorylation                                                                                                                                                                                                                                                                                                                                                                                                                           | ↓5-LOX translocation                                                                                                 | Not evaluated                      | [51] |
| Rat peritoneal leukocytes.                                          | Sakuranetin, 7-O-methylaromadendrin and 3-acetyl-7-O-methylaromadendrin (5 – 100 µM). | ↓LTB <sub>4</sub> production A23187-stimulated rat peritoneal leukocytes treated with 7-O-methylaromadendrin, sakuranetin, and 3-acetyl-7-O-methylaromadendrin (IC <sub>50</sub> = 62, 9 and 15 µM, respectively); as a reference compound, apigenin also showed inhibitory effects (IC <sub>50</sub> = 14 µM); ↓PLA <sub>2</sub> activity (only 7-O-methylaromadendrin); ↓Elastase release (only sakuranetin at 100 µM); none of the flavanones tested inhibited PGE <sub>2</sub> biosynthesis in RAW 264.7 mouse macrophages. | ↓LTB <sub>4</sub> production in homogenized rat peritoneal polymorphonuclear leukocytes (only sakuranetin at 20 µM). | Not evaluated.                     | [52] |
| Human gastric epithelial cells (AGS) and murine macrophage RAW264.7 | NDGA and geraniin (10 µM).                                                            | ↓5-HETE production in AGS cells; ↓IL-8 and TNF-α in AGS cells and macrophages; attenuation of cPLA <sub>2</sub> induction by NDGA, but not geraniin.                                                                                                                                                                                                                                                                                                                                                                            | ↓5-LOX protein levels.                                                                                               | No effect on COX-2 protein levels. | [53] |
| BMMC cells                                                          | Meso-dihydroguaiaic acid (0.8 – 25 µM).                                               | ↓LTC <sub>4</sub> (IC <sub>50</sub> = 1.3 µM) in BMMC activated with KL (100 ng/ml); ↓PGD <sub>2</sub> (IC <sub>50</sub> = 9.8 µM) in BMMC activated with KL (100 ng/ml), IL-10 (100 U/ml) and LPS (100 ng/ml); ↓Degranulation                                                                                                                                                                                                                                                                                                  | Not evaluated.                                                                                                       | No effect on COX-2 protein levels. | [54] |

|                                         |                                                                                                                                                               |                                                                                                                                                                                                                                                                                                                                                                                                                                                                                                                    |                                                                                                  |                |         |
|-----------------------------------------|---------------------------------------------------------------------------------------------------------------------------------------------------------------|--------------------------------------------------------------------------------------------------------------------------------------------------------------------------------------------------------------------------------------------------------------------------------------------------------------------------------------------------------------------------------------------------------------------------------------------------------------------------------------------------------------------|--------------------------------------------------------------------------------------------------|----------------|---------|
|                                         |                                                                                                                                                               | reaction in a dose dependent manner (IC <sub>50</sub> = 11.4 µM).                                                                                                                                                                                                                                                                                                                                                                                                                                                  |                                                                                                  |                |         |
| PMNLs from healthy donors.              | Carnosic acid and carnosol (0.03 – 30 µM).                                                                                                                    | ↓LTB <sub>4</sub> , 5(S),12(S)-diHETE, and 5-H(p)ETE in A23187-stimulated PMNL treated with carnosol and carnosic acid (IC <sub>50</sub> = 7.0 and 15-20 µM, respectively); ↓12-HETE and 12-HPETE synthesis in A23187-stimulated PMNL treated with carnosol (IC <sub>50</sub> = 13 µM), but no effect on cells treated with carnosic acid; Antagonise intracellular Ca <sup>2+</sup> mobilisation induced by a chemotactic stimulus, and attenuate formation of ROS and the secretion of human leukocyte elastase. | ↓5-LOX activity (IC <sub>50</sub> = 0.1 and 1.0 µM for carnosic acid and carnosol, respectively) | Not evaluated. | [55]    |
| PBMC isolated from whole human blood.   | Quercetin, 3'-O-methylquercetin (MQ), quercetin-3'-O-sulfate (QS), quercetin-3-O-glucuronide (QG) and 3'-O-methylquercetin-3-O-glucuronide (MQG) (1 – 10 µM). | ↓LTB <sub>4</sub> synthesis in A23187-stimulated PBMCs treated with quercetin (IC <sub>50</sub> = 2.0 µM) and MQ at 2.0 µM; ↓PGE <sub>2</sub> formation in LPS-activated PBMCs treated with quercetin and MQ (IC <sub>50</sub> = 2.0 µM); lack of effect for the rest of compounds tested                                                                                                                                                                                                                          | Not evaluated.                                                                                   | Not evaluated. | [56]    |
| Rat adherent macrophages from granuloma | NDGA (10 µM)                                                                                                                                                  | ↓LTB <sub>4</sub> synthesis in stimulated cells                                                                                                                                                                                                                                                                                                                                                                                                                                                                    | ↓5-LOX expression (mRNA and protein)                                                             | Not evaluated  | [57,58] |
| BBMCs isolated from mice                | Isolated phenolic compounds from <i>Ailanthus altissima</i> leaves                                                                                            | Scopoletin, quercetin and luteolin inhibited the biosynthesis of PGD <sub>2</sub> (IC <sub>50</sub> = 39.2, 7.3 and 2.5 µM, respectively) and LTC <sub>4</sub> (IC <sub>50</sub> = 59.9, 5.1 and 1.8 µM, respectively); no effect of astragalin and scopoline at the concentrations tested.                                                                                                                                                                                                                        | Not evaluated                                                                                    | Not evaluated  | [59]    |

|                                  |                          |                                                                                                                                                                                                                        |                                                                                                                                                                                                                                                                                                                                                                                                                                                   |                                    |      |
|----------------------------------|--------------------------|------------------------------------------------------------------------------------------------------------------------------------------------------------------------------------------------------------------------|---------------------------------------------------------------------------------------------------------------------------------------------------------------------------------------------------------------------------------------------------------------------------------------------------------------------------------------------------------------------------------------------------------------------------------------------------|------------------------------------|------|
|                                  |                          | The methanolic extract and solvent fractions of <i>Ailanthus altissima</i> inhibited PGD <sub>2</sub> (49.0 – 57.4%) and LTC <sub>4</sub> (96.7 – 99.8%) at 50 µg/mL                                                   |                                                                                                                                                                                                                                                                                                                                                                                                                                                   |                                    |      |
| Human neutrophils                | Hyperforin (0.3 – 30 µM) | ↓5-LOX product biosynthesis (IC <sub>50</sub> = 1.9 µM) in intact neutrophils via inhibition of 5-LOX translocation to the nuclear membrane. This effect was reduced in the presence of OAG (IC <sub>50</sub> ≥ 10 µM) | ↓5-LOX activity in cell homogenates (IC <sub>50</sub> ~ 30 µM), in partially purified (IC <sub>50</sub> ~ 7 µM) and purified enzyme (IC <sub>50</sub> = 1.6 µM). This inhibition occurs via interaction with the Trp residues within the 5-LOX C2-like domain and blocking the binding of 5-LOX with CLP. Besides, this inhibitory effect was independent of the redox tone and blocked in the presence of OAG (IC <sub>50</sub> ≥ 10 µM) and PC. | Not evaluated                      | [60] |
| RBL-1 cells and RAW 264.7 cells. | (-)-Nyasol (2 – 100 µM). | ↓Cys-LT production in A23187-treated RBL-1 cells at 2 – 10 µM. As a reference compound, NDGA also exerted inhibitory effects at 5 µM;                                                                                  | Not evaluated.                                                                                                                                                                                                                                                                                                                                                                                                                                    | No effect on COX-2 protein levels. | [61] |

|                                   |                                                                                                                                      |  |                                                                                                                                                                                                                                                                                                                          |                                                              |                                                              |      |
|-----------------------------------|--------------------------------------------------------------------------------------------------------------------------------------|--|--------------------------------------------------------------------------------------------------------------------------------------------------------------------------------------------------------------------------------------------------------------------------------------------------------------------------|--------------------------------------------------------------|--------------------------------------------------------------|------|
|                                   |                                                                                                                                      |  | ↓PGD <sub>2</sub> and NO production in LPS-treated RAW 264.7 cells at 1 – 100 µM.                                                                                                                                                                                                                                        |                                                              |                                                              |      |
| RBL-1 and RAW 264.7 cells         | <i>Schisandra fructus</i> methanolic extract and the individual compounds such as vanillic acid; NDGA as control of 5-LOX inhibition |  | ↓5-LOX products formation (Cys-LTs) y RBL-1 cells treated with the extract (IC <sub>50</sub> = 71.1 µg/mL) and NDGA (IC <sub>50</sub> = 0.2 – 1 µM); vanillic acid had no effect; the extract and vanillic acid exerted less than 50% inhibition against PGE <sub>2</sub> and NO formation at the concentrations tested. | Not evaluated                                                | Not evaluated                                                | [62] |
| Rat endothelial cells (YPEN-1).   | Morin (1 and 5 µM).                                                                                                                  |  | ↓ROS generation; ↓NF-κB activation (via reduced DNA binding activity, IκBα phosphorylation and p65/p50 nuclear translocation); modulation of ERK and p38 signal transduction; ↓iNOS protein levels in <i>t</i> -BHP-induced YPEN-1 cells.                                                                                | ↓5-LOX protein levels in <i>t</i> -BHP-induced YPEN-1 cells. | ↓COX-2 protein levels in <i>t</i> -BHP-induced YPEN-1 cells. | [63] |
| Murine macrophage RAW264.7 cells. | Curcumin (0.63 – 80 µM).                                                                                                             |  | ↓PGE <sub>2</sub> formation in LPS-stimulated RAW264.7 cells; ↑HO-1 mRNA expression and protein level; no effect on iNOS (mRNA expression and protein level), cPLA <sub>2</sub> (mRNA expression)                                                                                                                        | No effect on 5-LOX mRNA expression.                          | No effect on COX-2 mRNA expression and protein level.        | [64] |
| BMCMC cells                       | NDGA (3 µM).                                                                                                                         |  | ↑PGE <sub>2</sub> and ↓LTB <sub>4</sub> /LTC <sub>4</sub> production in BMCMCs stimulated with ConA (mimics IgE cross-linking), substance P (following culture of cells with IL-4) or A23187; ↓degranulation of BMCMCs stimulated with ConA and A23187.                                                                  | Not evaluated.                                               | Not evaluated.                                               | [65] |
| RBL-1                             | 13 phenolic compounds isolated from <i>Lonicera japonica</i> (20                                                                     |  | The compounds that exerted the highest inhibition on 5-LOX products (Cys-LTs) formation were protocatechuic acid (35.8%), 3,5-                                                                                                                                                                                           | Not evaluated                                                | Not evaluated                                                | [66] |



|                            |                                                                                                                                                                                              |                                                                                                                                                                                                                                          |                                                                                                                                |                                                       |      |
|----------------------------|----------------------------------------------------------------------------------------------------------------------------------------------------------------------------------------------|------------------------------------------------------------------------------------------------------------------------------------------------------------------------------------------------------------------------------------------|--------------------------------------------------------------------------------------------------------------------------------|-------------------------------------------------------|------|
|                            | μM); NDGA as control of 5-LOX inhibition                                                                                                                                                     | dicafeoylquinic acid methylester (15.1%), luteolin (97.0%), quercetin 3-O-β-D-glucopyranoside (11.1%) and NDGA (100%)                                                                                                                    |                                                                                                                                |                                                       |      |
| Human isolated PBMC        | Quercetin (25 μM)                                                                                                                                                                            | ↓TLR-2 and TLR-4 mRNA expression; ↓NF-κB activation; ↓IL-6 biosynthesis; ↓iNOS mRNA expression; ↓PGE <sub>2</sub> biosynthesis                                                                                                           | ↓5-LOX production;                                                                                                             | ↓COX-2 mRNA expression; ↓COX production;              | [67] |
| RBL-1 cells                | Scopoletin, scopolin, scoparone, esculetin chlorogenic acid, quercetin, isorhamnetin-3-O-galactoside, isorhamnetin-3-O-robinobioside, capillarisin, and NDGA (0.1 – 50 μM)                   | ↓LTB <sub>4</sub> biosynthesis in A23187-stimulated cells. The most effective compounds were NDGA (95.7% inhibition at 1 μM), as well as esculetin, quercetin, and capillarisin (IC <sub>50</sub> = 6.6, 0.7 and 17.7 μM, respectively). | Not evaluated                                                                                                                  | Not evaluated                                         | [68] |
| Rat peritoneal macrophages | <i>Platyclusus orientalis</i> chloroform extract (12.5 – 100 μg/mL) and the individual compounds hinokiol and acacetin (12.5 – 100 μM); 12.5 μM NDGA was used as control of 5-LOX inhibition | ↓5-HETE and LTB <sub>4</sub> ; ↓12-HHT; the extract showed no inhibitory effect on LTA <sub>4</sub> hydrolase                                                                                                                            | ↓5-LOX activity (43.2% for honokiol and 48.8% for acacetin at 100 μM; IC <sub>50</sub> = 7.1 μM for NDGA) in a cell-free assay | Moderate or weak COX-2 inhibition in cell-free assays | [69] |
| RBL-2H3 cells              | Extracts of <i>Foeniculum vulgare</i> (12.5 – 200 mg/mL), its individual compounds (50 μM) and 1 μM NDGA as positive control                                                                 | ↓5-LOX products (Cys-LTs) formation in cells treated with the extracts (only at 200 μg/mL); the individual phenolics (scopoletin and umbelliferone) had no effect on 5-LOX activity; 1 μM NDGA exerted a strong inhibition (92.4%)       | Not evaluated                                                                                                                  | Not evaluated                                         | [70] |

|                                                              |                                         |                                                                                                                                                                                                                                                                                                                                                                                                                                                                                                     |                                                                                                                                                                            |                                           |      |
|--------------------------------------------------------------|-----------------------------------------|-----------------------------------------------------------------------------------------------------------------------------------------------------------------------------------------------------------------------------------------------------------------------------------------------------------------------------------------------------------------------------------------------------------------------------------------------------------------------------------------------------|----------------------------------------------------------------------------------------------------------------------------------------------------------------------------|-------------------------------------------|------|
| RBL-2H3 cells                                                | Macelignan (5, 10 and 20 $\mu$ M)       | No cytotoxic effect; $\downarrow\beta$ -hexosaminidase (8 – 32% inhibition) and histamine release (8 – 27% inhibition); $\downarrow\text{Ca}^{+2}$ intracellular concentration; $\downarrow\text{PGE}_2$ and $\text{LTC}_4$ biosynthesis; $\downarrow\text{IL-4}$ , $\text{IL-13}$ , and $\text{TNF-}\alpha$ formation; $\downarrow\text{Akt}$ and $\text{MAPK}$ phosphorylation                                                                                                                    | $\downarrow 5\text{-LOX}$ mRNA expression                                                                                                                                  | $\downarrow\text{COX-2}$ mRNA expression  | [71] |
| PMNL from healthy donors, whole human blood and HEK293 cells | Caffeic acid and CAPE (0.1-30 $\mu$ M). | CAPE exerted a $\downarrow\text{LT}$ biosynthesis ( $\text{LTB}_4$ , 20-COOH- and 20-OH- $\text{LTB}_4$ as well as 5-HETE) in thapsigargin-stimulated PMNLs (53-85% inhibition at 1 $\mu$ M; $\text{IC}_{50}$ = 0.52 $\mu$ M) as well as in zymosan-stimulated whole blood treated (32% reduction at 1 $\mu$ M; $\text{IC}_{50}$ = 1.79 $\mu$ M); CAPE also exerted a $\downarrow\text{AA}$ release in thapsigargin-stimulated PMNLs (32% reduction at 1 $\mu$ M); Caffeic acid exerted no effects. | CAPE exerted $\downarrow 5\text{-LOX}$ activity ( $\text{IC}_{50}$ = 0.13 $\mu$ M) whereas caffeic acid had no effect on the enzyme isolated from 5-LOX-transfected HEK293 | Not evaluated.                            | [72] |
| Rat basophilic leukemia (RBL-2H3) cells.                     | Panduratin A (1 – 20 $\mu$ M).          | The effects observed in A23187- and PMA-stimulated RBL-2H3 cells were: $\downarrow\text{LTB}_4$ and $\text{PGE}_2$ formation as well as $\downarrow\text{AA}$ release; $\downarrow\text{Ca}^{2+}$ influx and $\beta$ -hexosaminidase and histamine secretion at 20 $\mu$ M; $\downarrow\text{IL-4}$ , $\text{IL-13}$ , and $\text{TNF-}\alpha$ mRNA expression; $\downarrow\text{Akt}$ , $\text{ERK}$ , $\text{p38}$ , and $\text{JNK}$ phosphorylation                                             | $\downarrow 5\text{-LOX}$ mRNA expression.                                                                                                                                 | $\downarrow\text{COX-2}$ mRNA expression. | [73] |
| Primary avian polymorphonuclear leukocytes.                  | Caffeic acid (5 $\mu$ M).               | $\downarrow\text{LTB}_4$ production in leukocytes stimulated with TLR agonists (FLG, PAM or CpG).                                                                                                                                                                                                                                                                                                                                                                                                   | Not evaluated.                                                                                                                                                             | Not evaluated.                            | [74] |
| Feline esophageal epithelial cells.                          | Eupatilin (25-200 $\mu$ M).             | $\downarrow\text{H}_2\text{O}_2$ -induced cytotoxicity (dose-dependent effect), $\downarrow\text{p38}$ and $\text{JNK}$ activation, and $\text{LTB}_4$ production at 150 $\mu$ M (12 h pretreatment).                                                                                                                                                                                                                                                                                               | $\downarrow 5\text{-LOX}$ expression in $\text{H}_2\text{O}_2$ -induced cells at 150 $\mu$ M (12 h pre-treatment)                                                          | Not evaluated.                            | [75] |

|                                                                     |                                                                                                                                                                                                                |                                                                                                                                                                                                                                                                                                                                                                                                                 |                                                                                                            |                                                                                                                                                                                                   |      |
|---------------------------------------------------------------------|----------------------------------------------------------------------------------------------------------------------------------------------------------------------------------------------------------------|-----------------------------------------------------------------------------------------------------------------------------------------------------------------------------------------------------------------------------------------------------------------------------------------------------------------------------------------------------------------------------------------------------------------|------------------------------------------------------------------------------------------------------------|---------------------------------------------------------------------------------------------------------------------------------------------------------------------------------------------------|------|
| Human neutrophils isolated from peripheral blood of healthy donors. | 3,3',4'-Tri-hydroxy-flavone, 3,5,7-tri-hydroxy-flavone, 3,7,3'-tri-hydroxy-flavone and 3,7,4'-tri-hydroxy-flavone (10 and 25 $\mu$ M), NDGA and quercetin (10 $\mu$ M)                                         | $\downarrow$ LTB <sub>4</sub> production in A23187- and AA-stimulated neutrophils (except for 3,7,3'-tri-hydroxy-flavone at 10 $\mu$ M); $\downarrow$ oxidation of luminol, amplex red and APF by reactive species generated by PMA-stimulated neutrophils; $\downarrow$ COX-1 activity in a cell-free system for 3,5,7-tri-hydroxy-flavone and 3,7,3'-tri-hydroxy-flavone in a concentration-dependent manner. | Not evaluated.                                                                                             | $\downarrow$ COX-2 activity in a cell-free system for 3,5,7-tri-hydroxyflavone in a concentration-dependent manner.                                                                               | [76] |
| RAW264.7 cells and rat peritoneal macrophages.                      | Baicalein and its glycoside, baicalin (1.5 – 100 $\mu$ M).                                                                                                                                                     | $\downarrow$ LTB <sub>4</sub> production in rat peritoneal macrophages in the presence of exogenous AA (IC <sub>50</sub> = 35.6 $\mu$ M); $\downarrow$ PGE <sub>2</sub> in LPS-stimulated RAW264.7 cells by baicalein (IC <sub>50</sub> = 28.6 $\mu$ M).                                                                                                                                                        | No effect on 5-LOX expression (mRNA and protein level).                                                    | $\downarrow$ COX-2 mRNA expression and protein level in LPS-stimulated RAW264.7 cells.                                                                                                            | [77] |
| Human isolated PMNL or monocytes                                    | Cannaflavin A and B (0.1 – 10 $\mu$ M)                                                                                                                                                                         | $\downarrow$ 5-LOX products (LTB <sub>4</sub> , tr-LTB <sub>4</sub> , 5-HPETE) with IC <sub>50</sub> = 1.6 – 2.4 $\mu$ M for cannaflavin A; $\downarrow$ PGE <sub>2</sub> biosynthesis (IC <sub>50</sub> = 8.8 $\mu$ M for cannaflavin A) in LPS stimulated monocytes; $\downarrow$ 12-HHT in platelets (IC <sub>50</sub> > 10 $\mu$ M for cannaflavin A)                                                       | $\downarrow$ 5-LOX (IC <sub>50</sub> = 0.8 and 0.9 $\mu$ M for cannaflavin A and B, respectively) activity | $\downarrow$ mPGES-1 activity by both compounds (cannaflavin A showed IC <sub>50</sub> = 1.8 $\mu$ M); $\downarrow$ COX-1 and COX-2 activity (cannaflavin A showed IC <sub>50</sub> > 10 $\mu$ M) | [78] |
| Human isolated neutrophils                                          | Luteolin, NDGA, quercetin, 3',4'-dihydroxyflavone, apigenin, acacetin, chrysoeriol, diosmetin, taxifolin, chrysin, ( $\pm$ )-eriodictyol ( $\pm$ )-naringenin and other related flavonoids (10 and 40 $\mu$ M) | The highest inhibition of LTB <sub>4</sub> synthesis was exerted by luteolin (IC <sub>50</sub> = 1.6 $\pm$ 0.3 $\mu$ M), 3',4'-dihydroxyflavone (IC <sub>50</sub> = 1.7 $\pm$ 0.1 $\mu$ M), quercetin (IC <sub>50</sub> = 4.0 $\pm$ 1.2 $\mu$ M), NDGA (56.5 $\pm$ 2.5% inhibition at 1 $\mu$ M) and eriodictyol (53.4 $\pm$ 4.8% inhibition at 40 $\mu$ M).                                                    | Not evaluated                                                                                              | Not evaluated                                                                                                                                                                                     | [79] |

|                                                      |                                                                                                                                 |                                                                                                                                                                                                                                                                                                                                                                                                                                                                         |                                                                                                   |                                                                                                           |      |
|------------------------------------------------------|---------------------------------------------------------------------------------------------------------------------------------|-------------------------------------------------------------------------------------------------------------------------------------------------------------------------------------------------------------------------------------------------------------------------------------------------------------------------------------------------------------------------------------------------------------------------------------------------------------------------|---------------------------------------------------------------------------------------------------|-----------------------------------------------------------------------------------------------------------|------|
| BMMC                                                 | Homoisoflavanone (5,7-di-hydroxy-3-(3-hydroxy-4-methoxy-benzyl)-chroman-4-one) (1.4 – 14.4 $\mu$ M).                            | $\downarrow$ LTB <sub>4</sub> , LTC <sub>4</sub> and PGD <sub>2</sub> in DNP-IgE and DNP-HSA-activated BMCMCs; $\downarrow$ mRNA level and release of IL-6 and TNF- $\alpha$ ; $\downarrow$ degranulation of BMCMCs; no effect on COX-1 protein levels                                                                                                                                                                                                                  | $\downarrow$ 5-LOX protein levels in DNP-IgE and DNP-HSA-activated BMCMCs.                        | $\downarrow$ COX-2 protein levels in DNP-IgE and DNP-HSA-activated BMCMCs.                                | [80] |
| BMMCs-isolated from bone marrow of C57BL/6           | Curcumin (1 – 10 $\mu$ M)                                                                                                       | $\downarrow$ LTC <sub>4</sub> and Ca <sup>+2</sup> influx in IgE/Ag-induced BMCMCs; $\downarrow$ COX-2-dependent PGD <sub>2</sub> synthesis; $\downarrow$ cPLA <sub>2</sub> phosphorylation and translocation; inhibition of NF- $\kappa$ B, MAPK, and Syk pathways (all the effects were dose-dependent).                                                                                                                                                              | $\downarrow$ 5-LOX translocation                                                                  | Not evaluated                                                                                             | [81] |
| PMNL from healthy donors.                            | Pinostilbene, rhapontigenin, isorhapontigenin, RSV, oxyresveratrol, pterostilbene                                               | $\downarrow$ LTB <sub>4</sub> (IC <sub>50</sub> = 18.5 $\pm$ 7.8 and 9.32 $\pm$ 3.3 $\mu$ M for oxyresveratrol and pterostilbene, respectively; IC <sub>50</sub> > 50 $\mu$ M for the rest of compounds)<br>Pinostilbene exerted the highest COX-1 and COX-2 inhibition (IC <sub>50</sub> = 1.9 $\pm$ 1.6 and 0.35 $\pm$ 0.23, respectively), whereas rhapontigenin was the weakest compound (IC <sub>50</sub> = 24.55 $\pm$ 10.38 and 36.12 $\pm$ 10.43, respectively) | Molecular docking analysis showed that pterostilbene formed hydrogen bonds with His372 and Thr364 | Molecular docking analysis showed that pinostilbene formed hydrogen bonds with Arg129, Phe518 and Gln192; | [82] |
| PMNL from healthy donors.                            | Xanthohumol, xanthohumol C, 8-prenylnaringenin, 4-hydroxy-colupulone, humulone, cascadenone and humudifucol (up to 10 $\mu$ M). | $\downarrow$ LTB <sub>4</sub> and 5-HPETE in A23187- and AA-stimulated PMNLs treated with xanthohumol (IC <sub>50</sub> = 2.9 $\mu$ M); no effects observed with the rest of compounds.                                                                                                                                                                                                                                                                                 | Not evaluated.                                                                                    | Not evaluated.                                                                                            | [83] |
| Human peripheral neutrophils from human whole blood. | Daidzein, dihydrodaidzein, and equol (0.01 – 1 $\mu$ M).                                                                        | $\downarrow$ LTB <sub>4</sub> A23187- and AA- stimulated neutrophils (IC <sub>50</sub> = 0.2 $\mu$ M for equol; 20% of inhibition for daidzein and dihydrodaidzein 1 $\mu$ M); no effect on the enzymatic hydrolysis of LTA <sub>4</sub> to LTB <sub>4</sub> ; $\downarrow$ free radical peroxidation of AA (IC <sub>50</sub>                                                                                                                                           | Not evaluated.                                                                                    | Not evaluated.                                                                                            | [84] |

|                                   |                                                                                                                      |                                                                                                                                                                                                                                                                                                                                                                                                                                                                                                                    |                                                                                                                                                                                                            |                                       |      |
|-----------------------------------|----------------------------------------------------------------------------------------------------------------------|--------------------------------------------------------------------------------------------------------------------------------------------------------------------------------------------------------------------------------------------------------------------------------------------------------------------------------------------------------------------------------------------------------------------------------------------------------------------------------------------------------------------|------------------------------------------------------------------------------------------------------------------------------------------------------------------------------------------------------------|---------------------------------------|------|
|                                   |                                                                                                                      | = 0.6 $\mu$ M for daidzein and >1.0 $\mu$ M for equol and dihydrodaidzein); $\downarrow$ MPO activity ( $IC_{50}$ = 0.45, 0.7 and >1.0 $\mu$ M for equol, dihydrodaidzein and daidzein, respectively)                                                                                                                                                                                                                                                                                                              |                                                                                                                                                                                                            |                                       |      |
| Isolated human PMNL               | CAPE (1 $\mu$ M)                                                                                                     | $\downarrow$ 5-LOX products                                                                                                                                                                                                                                                                                                                                                                                                                                                                                        | Molecular docking analysis showed affinity = -8.5 Kcal/mol and interaction with His372                                                                                                                     | Not evaluated.                        | [85] |
| RAW 264.7 macrophages             | Isoorientin (1 – 25 $\mu$ M; 16 h)                                                                                   | $\downarrow$ TNF- $\alpha$ , IL-1 $\beta$ , iNOS expression and NF- $\kappa$ B pathway;                                                                                                                                                                                                                                                                                                                                                                                                                            | $\downarrow$ 5-LOX protein expression                                                                                                                                                                      | $\downarrow$ COX-2 protein expression | [86] |
| Mouse mast cell line (PB-3c).     | Daidzein, genistein and their glycosides (daidzin and genistin), equol, quercetin and kaempferol (50 $\mu$ M; 48 h). | $\downarrow$ LTB <sub>4</sub> production A23187- and AA-stimulated PB-3c cells (100% inhibition exerted by equol, quercetin and kaempferol, 72.5% by genistein, and a weak but significant suppression by daidzin and daidzein).                                                                                                                                                                                                                                                                                   | Not evaluated.                                                                                                                                                                                             | Not evaluated.                        | [87] |
| Isolated human PMNL and platelets | Baicalein, apigenin, quercetin, CAPE, myricetin (0.1 – 20 $\mu$ M)                                                   | $\downarrow$ 5-LOX products (including LTB <sub>4</sub> , 6- <i>trans</i> -LTB <sub>4</sub> , 6- <i>trans</i> -12- <i>epi</i> -LTB <sub>4</sub> , 20-OH-LTB <sub>4</sub> , 20-COOH-LTB <sub>4</sub> , and 5-HETE); $IC_{50}$ = 11.0 and 5.97 $\mu$ M in PMNL for baicalein and quercetin, respectively). $\downarrow$ 12-HETE ( $IC_{50}$ = 1.78, 1.34 and 1.28 $\mu$ M, respectively) and 12-HHT ( $IC_{50}$ = 9.92, 2.91 and 3.79 $\mu$ M, respectively) in platelets treated with baicalein, quercetin and CAPE | Molecular docking analysis using soybean 15-LOX; (i) CAPE's affinity = -5.4 kcal/mol and interaction with Arg426, Ser510, His518 and Phe576 (ii) Baicalein's affinity = -1.4 kcal/mol and interaction with | Not evaluated.                        | [88] |

|                                             |                                                                                                                                                     |                                                                                                                                                                                                                                                                                                                                                                                                                |                                                                                                                                                     |                                                                 |      |
|---------------------------------------------|-----------------------------------------------------------------------------------------------------------------------------------------------------|----------------------------------------------------------------------------------------------------------------------------------------------------------------------------------------------------------------------------------------------------------------------------------------------------------------------------------------------------------------------------------------------------------------|-----------------------------------------------------------------------------------------------------------------------------------------------------|-----------------------------------------------------------------|------|
|                                             |                                                                                                                                                     |                                                                                                                                                                                                                                                                                                                                                                                                                | Fe, His518 and Phe576<br>(iii) Quercetin's affinity = 0.8 kcal/mol and interaction with Asp766, His518 and Phe576                                   |                                                                 |      |
| Isolated human PMNL and whole blood         | CAPE (0.1 – 10 $\mu$ M)                                                                                                                             | $\downarrow$ 5-LOX products (including LTB <sub>4</sub> , tr-LTB <sub>4</sub> , 20-OH-LTB <sub>4</sub> , 20-COOH-LTB <sub>4</sub> , and 5-HETE); IC <sub>50</sub> = 0.97 and 3.58 $\mu$ M in PMNL and whole blood, respectively)                                                                                                                                                                               | Molecular docking analysis into the active site of 5-LOX (crystal structure) showed affinity = -8.8 Kcal/mol and interaction with Leu420 and His372 | Not evaluated                                                   | [89] |
| Caco-2                                      | Hydroxytyrosol (1 $\mu$ M)                                                                                                                          | $\downarrow$ PGE <sub>2</sub> , LTB <sub>4</sub> , 5-HETE, 12-HETE, 15-HETE, 13-HODE                                                                                                                                                                                                                                                                                                                           | Not evaluated.                                                                                                                                      | Not evaluated.                                                  | [90] |
| RAW 264.7 macrophages                       | Ellagic acid-3,3',4-trimethoxy-4'-O- $\alpha$ -L-rhamnopyranoside (1 – 100 $\mu$ M for toxicity assays; 1 – 5 $\mu$ M for anti-inflammatory assays) | $\downarrow$ NO, TNF- $\alpha$ , IL-6 and NF- $\kappa$ B expression; $\uparrow$ IL-10                                                                                                                                                                                                                                                                                                                          | $\downarrow$ 5-LOX level in culture medium                                                                                                          | $\downarrow$ COX-2 level in culture medium                      | [91] |
| Human monocytes, neutrophils and platelets. | Ginkgolic acid (0.1 – 10 $\mu$ M).                                                                                                                  | $\downarrow$ Tr-LTB <sub>4</sub> isomers and 5-HPETE in A23187-stimulated intact human neutrophils in the presence or absence of exogenous AA (IC <sub>50</sub> = 3.8 and 2.9 $\mu$ M, respectively); $\downarrow$ 12-HHT formation by isolated COX-1 (IC <sub>50</sub> = 8.1 $\mu$ M); $\downarrow$ 12-HHT and TxB <sub>2</sub> formation in AA-stimulated platelets (IC <sub>50</sub> = 2.1 and 2.2 $\mu$ M, | $\downarrow$ Tr-LTB <sub>4</sub> isomers and 5-HPETE synthesized by human recombinant 5-LOX (IC <sub>50</sub> = 0.2 $\mu$ M)                        | No effect on COX-2 activity (human recombinant isolated enzyme) | [92] |

|                               |                                                                                                                                                                          |                                                                                                                                                                                                                                                                                                                                                                                                                                                                                                                                                                                                             |                                                                                                                                                                                      |                                                            |      |
|-------------------------------|--------------------------------------------------------------------------------------------------------------------------------------------------------------------------|-------------------------------------------------------------------------------------------------------------------------------------------------------------------------------------------------------------------------------------------------------------------------------------------------------------------------------------------------------------------------------------------------------------------------------------------------------------------------------------------------------------------------------------------------------------------------------------------------------------|--------------------------------------------------------------------------------------------------------------------------------------------------------------------------------------|------------------------------------------------------------|------|
|                               |                                                                                                                                                                          | respectively); $\downarrow$ PGE <sub>2</sub> , PGD <sub>2</sub> , TxB <sub>2</sub> , PGF <sub>2<math>\alpha</math></sub> , 11-HETE, 12-HHT, PGE <sub>1</sub> and TxB <sub>1</sub> in LPS-stimulated monocytes.                                                                                                                                                                                                                                                                                                                                                                                              |                                                                                                                                                                                      |                                                            |      |
| PBMCs from healthy donors.    | Apigenin, EGCG, genistein, naringenin, nobiletin, wogonin), RSV and its dimer ( $\epsilon$ -viniferin), tetramer (hopeaphenol), and imine analogues (IRA) (1–10 $\mu$ M) | $\downarrow$ LTB <sub>4</sub> production by A23187- stimulated neutrophils treated with genistein, resveratrol, IRA (1 and 10 $\mu$ M) and $\epsilon$ -viniferin (10 $\mu$ M); LC-MS based targeted oxylipin metabolomics showed that: RSV inhibited the COX-1/2 pathway and exerted a weak attenuation of the 12/15-LOX activity; $\epsilon$ -viniferin caused a clear substrate shunt towards the remaining AA cascade enzymes (15-LOX, COX-1/2, cytochrome P450); IRA had no impact on 15-LOX activity, but elevated the formation of COX-derived PGs, having no inhibitory effects on COX-1/2 activity. | Not evaluated.                                                                                                                                                                       | Not evaluated.                                             | [93] |
| Murine mast cell line (MC/9). | Kuwanon G and Morusin (0.5–10 $\mu$ M).                                                                                                                                  | $\downarrow$ LTB <sub>4</sub> production in PMA- and A23187-stimulated MC/9 mast cells treated with morusin (2 and 4 $\mu$ M); $\downarrow$ histamine production by kuwanon G (2.5–10 $\mu$ M) and morusin (4 $\mu$ M).                                                                                                                                                                                                                                                                                                                                                                                     | $\downarrow$ 5-LOX nuclear protein level, but not cytoplasmic level in PMA- and A23187- stimulated MC/9 mast cells treated with kuwanon G (2.5 – 10 $\mu$ M) and morusin (4 $\mu$ M) | Not evaluated.                                             | [94] |
| BMMC                          | Taxifolin (dihydroquercetin) (1, 2 and 5 $\mu$ M).                                                                                                                       | $\downarrow$ LTC <sub>4</sub> in IgE/Ag-stimulated and DNP-HSA-activated BMMCs.                                                                                                                                                                                                                                                                                                                                                                                                                                                                                                                             | $\downarrow$ 5-LOX nuclear protein levels in                                                                                                                                         | $\downarrow$ COX-2 protein levels in IgE/Ag-stimulated and | [95] |

|                            |                                                                                                                                  |                                                                                                                                                                                                                                                                                                                                                                                                                                                                |                                                                                                      |                                                                                                                                                     |      |
|----------------------------|----------------------------------------------------------------------------------------------------------------------------------|----------------------------------------------------------------------------------------------------------------------------------------------------------------------------------------------------------------------------------------------------------------------------------------------------------------------------------------------------------------------------------------------------------------------------------------------------------------|------------------------------------------------------------------------------------------------------|-----------------------------------------------------------------------------------------------------------------------------------------------------|------|
|                            |                                                                                                                                  | <p>↓IL-6 and MAPKs protein levels, translocation of cPLA<sub>2</sub> and Akt/IKK/NF-κB pathway in IgE/Ag-stimulated and DNP-HSA-activated BMMCs.</p> <p>↓degranulation, histamine release, phosphorylation of PLCγ, and Ca<sup>2+</sup> mobilization in IgE/Ag-stimulated and DNP-HSA-activated BMMCs.</p>                                                                                                                                                     | IgE/Ag-stimulated and DNP-HSA-activated BMMCs.                                                       | DNP-HSA-activated BMMCs.                                                                                                                            |      |
| PMNLs from healthy donors. | Uro-A, Uro-B, Uro-C and IsoUro-A, and their conjugates Uro-A glur, Uro-B glur, IsoUro-A-glur and Uro-A sulfate (1, 5 and 15 μM). | <p>↓LTB<sub>4</sub> and 5-HETE (dose-dependent) synthesis in A23187/LPS-stimulated PMNLs treated with Uro-C (15 μM);</p> <p>↓PGE<sub>2</sub> formation A23187/LPS-stimulated PMNLs treated with Uro-A or IsoUro-A (15 μM);</p> <p>↓HKE<sub>2</sub> and HKD<sub>2</sub> production (5-LOX/COX-2 pathway) in A23187/LPS-stimulated PMNLs treated with Uro-A, IsoUro-A, and Uro-C at 15 μM;</p> <p>↓HKD<sub>2</sub> in the cells treated with Uro-B at 15 μM.</p> | <p>↑No effect on 5-LOX protein level in A23187/LPS-stimulated PMNLs treated with Uro-C at 15 μM.</p> | <p>↓COX-2 protein level in A23187/LPS-stimulated PMNLs treated with Uro-A and IsoUro-A at 15 μM; no effect of these compounds on COX-2 activity</p> | [96] |
| Caco-2                     | 5,7 di-hydroxy-3,3',4'-trimethoxyflavone and 3,5,6,7,4'-pentamethoxy-flavone                                                     | ↓TNF-α and IL-1β as well as NF-κB activation compared to LPS-treated cells.                                                                                                                                                                                                                                                                                                                                                                                    | No effect on 5-LOX expression                                                                        | ↓COX-2 expression in LPS-treated cells                                                                                                              | [97] |
| Human neutrophils          | NDGA (1 μM)                                                                                                                      | ↓TLB <sub>4</sub> , tr-LTB <sub>4</sub> , 20-OH-LTB <sub>4</sub> , 5-HETE, 12-HETE and 15-HETE                                                                                                                                                                                                                                                                                                                                                                 | No effect on 5-LOX expression                                                                        | No effect on COX-2 expression                                                                                                                       | [98] |
| RAW 264.7 macrophages      | Celery ethanol extract, and karafsin (apigenin-7-O-β-(5'-E-p-coumaroyl)-β-apio-furanoside)                                       | No cytotoxic effects; ↓NO release (0.0625 – 1 mg/mL).                                                                                                                                                                                                                                                                                                                                                                                                          | ↓5-LOX activity (25 – 500 mg/mL)                                                                     | ↓COX-2 activity (25 – 500 mg/mL)                                                                                                                    | [99] |



|                                                                                           |                                                                                                    |                                                                                                                                                                                                                                                                                                                                                                                                                                                           |                                                                                                                                                                                                      |                                                                                                |
|-------------------------------------------------------------------------------------------|----------------------------------------------------------------------------------------------------|-----------------------------------------------------------------------------------------------------------------------------------------------------------------------------------------------------------------------------------------------------------------------------------------------------------------------------------------------------------------------------------------------------------------------------------------------------------|------------------------------------------------------------------------------------------------------------------------------------------------------------------------------------------------------|------------------------------------------------------------------------------------------------|
| Rat basophilic leukemia cell line (RBL-2H3) cells.                                        | Tricin (30.2 $\mu$ M – 1.5 mM).                                                                    | $\downarrow$ LTB <sub>4</sub> , LTC <sub>4</sub> and PGE <sub>2</sub> formation in anti-DNP-IgE plus DNP-HAS-stimulated RBL-2H3 cells; $\downarrow$ hexosaminidase release; $\downarrow$ IL-4 and TNF- $\alpha$ level; $\downarrow$ cPLA <sub>2</sub> , Akt, ERK, p38, JNK, protein kinase C, phospholipase C1, Lyn and Syk phosphorylation; minimal effect on Fyn.                                                                                       | $\downarrow$ 5-LOX protein levels in anti-DNP-IgE plus DNP-HAS-stimulated RBL-2H3 cells.                                                                                                             | $\downarrow$ COX-2 protein levels in anti-DNP-IgE plus DNP-HAS-stimulated RBL-2H3 cells. [100] |
| Rat basophilic leukemia RBL-2H3 cells and human non-small-cell lung carcinoma A549 cells. | Red-kerneled rice proanthocyanidin -RRP- (catechin octamer) and catechin monomer (1 – 10 $\mu$ M). | $\downarrow$ LTB <sub>4</sub> and PGE <sub>2</sub> formation in A23187-stimulated RBL-2H3 and A549 cells treated with RRP at 1 $\mu$ M; RRP exerted inhibition of 12-LOX (IC <sub>50</sub> = 39.0 $\mu$ M) and p12-LOX (IC <sub>50</sub> = 47.5 $\mu$ M) activity; weak inhibitory effect on 15-LOX-2 (IC <sub>50</sub> >100 $\mu$ M); catechin exerted $\downarrow$ 15-LOX-2 (IC <sub>50</sub> = 20.4 $\mu$ M) and COX-1 (IC <sub>50</sub> = 30 $\mu$ M) | RRP and catechin exerted non-competitive inhibition against human 5-LOX (IC <sub>50</sub> = 15.1 and 2.2 $\mu$ M, respectively) and rat 5-LOX (IC <sub>50</sub> = 7.0 and 9.0 $\mu$ M, respectively) | RRP exerted no effect on COX-1 or COX-2 activity up to 500 $\mu$ M [101]                       |

Abbreviations: **AA**, arachidonic acid; **ADP**, adenosine diphosphate; **APF**, 2-[6-(4'-amino)phenoxy-3H-xanthen-3-on-9-yl]benzoic acid; **BMCMCs**, canine bone marrow derived cultured mast cells; **BMMC**, mice bone marrow-derived mast cells; **cAMP**, cyclic adenosine monophosphate; **CAPE**, caffeic acid phenethyl ester; **CLP**, coactosin-like protein; **ConA**, concanavalin A; **COX**, cyclooxygenase; **CpG**, unmethylated CpG motifs of bacteria DNA; **cPLA<sub>2</sub>**, cytoplasmic phospholipase-2; **Cys-LTs**, cysteinyl leukotrienes; **DNP-HAS**, dinitrophenyl human serum albumin; **DNP-IgE**, dinitrophenyl immunoglobulin E; **DPE**, 2-(3,4-dihydroxy-phenyl)-ethanol; **EGCG**, epigallocatechin gallate; **FLG**, flagellin; **fMLP**, formyl methionyl leucyl phenylalanine; **HETE**, hydroxyeicosatetraenoic acid; **HHT**, hydroxy-5,8,10-heptadecatetraenoic acid; **HKE<sub>2</sub>**, hemiketal E<sub>2</sub>; **HKD<sub>2</sub>**, hemiketal D<sub>2</sub>; **HODE**, hydroxyoctadecadienoic acid; **HO-1**, hemoxygenase-1; **HPETE**, hydroxyperoxyeicosatetraenoic acid; **iNOS**, inducible nitric oxide synthase; **KL**, c-kit ligand; **LOX**, lipoxygenase; **LOX-1**, lectin-like oxidized low-density lipoprotein receptor-1; **LPS**, lipopolysaccharide; **LT**, leukotrienes; **MAPK**, mitogen activated protein kinase; **MK2**, mitogen-activated protein kinase-activated protein kinase2; **mPGES**, microsomal prostaglandin E synthase; **MPO**, myeloperoxidase; **MQ**, 3'-O-methylquercetin; **MQG**, 3'-O-methylquercetin-3-O-glucuronide; **Myr-3-glur**, myricetin-3-O- $\beta$ -D-glucuronide; **NDGA**, nordihydroguaiaretic acid; **NF- $\kappa$ B**, nuclear factor kappa-light-chain-enhancer of activated B cells; **NO**, nitric oxide; **OAG**, 1-oleoyl-2-acetyl glycerol; **ox-LDL**, oxidized low density lipoprotein; **p12-LOX**, porcine leukocyte-like 12 lipoxygenase; **PAM**, bacterial lipoprotein mimic palmitoyl-3-cysteine-serine-lysine-4; **PBMCs**, peripheral blood mononuclear cells; **PC**, phosphatidil coline; **PG**, prostaglandins; **PLA<sub>2</sub>**, phospholipase-2; **PMA**, phorbol 12-myristate 13-acetate; **PMNLs**, polymorphonuclear leukocytes; **QG**, quercetin-3-O-glucuronide; **QS**, quercetin-3'-O-sulfate; **ROS**, reactive oxygen species; **RRP**, red-kerneled rice proanthocyanidin; **RSV**, resveratrol; **THC**, tetrahydrocurcumin; **TLR**, toll-like receptor; **TNF- $\alpha$** , tumor necrosis factor alpha; **Tr-LTB<sub>4</sub>**, trans-LTB<sub>4</sub>; **Trp**, tryptophan; **TxB<sub>2</sub>**, thromboxane B<sub>2</sub>; **Uro**, urolithins;

## References

1. Bokoch, G.M.; Reed, P.W. Evidence for Inhibition of Leukotriene A<sub>4</sub> Synthesis by 5,8,11,14-Eicosatetraynoic Acid in Guinea Pig Polymorphonuclear Leukocytes. *J. Biol. Chem.* **1981**, *256*, 4156–4159.
2. Chang, J.; Skowronek, M.D.; Cherney, M.L.; Lewis, A.J. Differential Effects of Putative Lipoxygenase Inhibitors on Arachidonic Acid Metabolism in Cell-Free and Intact Cell Preparations. *Inflammation* **1984**, *8*, 143–155, doi:10.1007/BF00916090.
3. Koshihara, Y.; Neichi, T.; Murota, S.; Lao, A.; Fujimoto, Y.; Tatsuno, T. Caffeic Acid Is a Selective Inhibitor for Leukotriene Biosynthesis. *Biochim. Biophys. Acta* **1984**, *792*, 92–97.
4. Kuhl, P.; Shiloh, P.; Jha, H.; Murawski, U.; Zilliken, F. 6,7,4'-Trihydroxyisoflavan: A Potent and Selective Inhibitor of 5-Lipoxygenase in Human and Porcine Peripheral Blood Leukocytes. *Prostaglandins* **1984**, *28*, 783–804, doi:10.1016/0090-6980(84)90035-2.
5. Salari, H.; Braquet, P.; Borgeat, P. Comparative Effects of Indomethacin, Acetylenic Acids, 15-HETE, Nordihydroguaiaretic Acid and BW755C on the Metabolism of Arachidonic Acid in Human Leukocytes and Platelets. *Prostaglandins. Leukot. Med.* **1984**, *13*, 53–60, doi:10.1016/0262-1746(84)90102-1.
6. Sirois, P.; Saura, C.; Salari, H.; Borgeat, P. Comparative Effects of Etodolac, Indomethacin, and Benoxaprofen on Icosanoid Biosynthesis. *Inflammation* **1984**, *8*, 353–364, doi:10.1007/BF00918212.
7. Bremm, K.D.; König, W.; Pfeiffer, P.; Rauschen, I.; Theobald, K.; Thelestam, M.; Alouf, J.E. Effect of Thiol-Activated Toxins (Streptolysin O, Alveolysin, and Theta Toxin) on the Generation of Leukotrienes and Leukotriene-Inducing and -Metabolizing Enzymes from Human Polymorphonuclear Granulocytes. *Infect. Immun.* **1985**, *50*, 844–851, doi:10.1128/iai.50.3.844-851.1985.
8. Reiner, N.E.; Malemud, C.J. Arachidonic Acid Metabolism by Murine Peritoneal Macrophages Infected with *Leishmania Donovan*: In Vitro Evidence for Parasite-Induced Alterations in Cyclooxygenase and Lipoxygenase Pathways. *J. Immunol. Baltim. Md 1950* **1985**, *134*, 556–563.
9. Bockor, A.M.; Pugsley, T.A. Effect of CI-922, a Potential New Antiallergy Agent, on Arachidonic Acid Metabolism in Vitro. *Inflammation* **1986**, *10*, 435–441, doi:10.1007/BF00915827.
10. Dreyling, K.W.; Hoppe, U.; Peskar, B.A.; Morgenroth, K.; Kozushek, W.; Peskar, B.M. Leukotriene Synthesis by Human Gastrointestinal Tissues. *Biochim. Biophys. Acta* **1986**, *878*, 184–193, doi:10.1016/0005-2760(86)90145-1.
11. Nielsen, O.H.; Bukhave, K.; Ahnfelt-Rønne, I.; Elmgreen, J. Arachidonic Acid Metabolism in Human Neutrophils: Lack of Effect of Cyclosporine A. *Int. J. Immunopharmacol.* **1986**, *8*, 419–426, doi:10.1016/0192-0561(86)90126-8.
12. Flynn, D.L.; Rafferty, M.F.; Bockor, A.M. Inhibition of Human Neutrophil 5-Lipoxygenase Activity by Gingerdione, Shogaol, Capsaicin and Related Pungent Compounds. *Prostaglandins. Leukot. Med.* **1986**, *24*, 195–198, doi:10.1016/0262-1746(86)90126-5.

13. Kimura, Y.; Okuda, H.; Okuda, T.; Hatano, T.; Arichi, S. Studies on the Activities of Tannins and Related Compounds, X. Effects of Caffeetannins and Related Compounds on Arachidonate Metabolism in Human Polymorphonuclear Leukocytes. *J. Nat. Prod.* **1987**, *50*, 392–399, doi:10.1021/np50051a009. 29 30
14. Moroney, M.A.; Alcaraz, M.J.; Forder, R.A.; Carey, F.; Hoult, J.R. Selectivity of Neutrophil 5-Lipoxygenase and Cyclo-Oxygenase Inhibition by an Anti-Inflammatory Flavonoid Glycoside and Related Aglycone Flavonoids. *J. Pharm. Pharmacol.* **1988**, *40*, 787–792, doi:10.1111/j.2042-7158.1988.tb05173.x. 31 32
15. Laughton, M.J.; Evans, P.J.; Moroney, M.A.; Hoult, J.R.; Halliwell, B. Inhibition of Mammalian 5-Lipoxygenase and Cyclo-Oxygenase by Flavonoids and Phenolic Dietary Additives. Relationship to Antioxidant Activity and to Iron Ion-Reducing Ability. *Biochem. Pharmacol.* **1991**, *42*, 1673–1681, doi:10.1016/0006-2952(91)90501-u. 33 34 35
16. Yamamoto, S.; Aizu, E.; Jiang, H.; Nakadate, T.; Kiyoto, I.; Wang, J.C.; Kato, R. The Potent Anti-Tumor-Promoting Agent Isoliquiritigenin. *Carcinogenesis* **1991**, *12*, 317–323, doi:10.1093/carcin/12.2.317. 36 37
17. Voss, C.; Sepulveda-Boza, S.; Zilliken, F.W. New Isoflavonoids as Inhibitors of Porcine 5-Lipoxygenase. *Biochem. Pharmacol.* **1992**, *44*, 157–162, doi:10.1016/0006-2952(92)90049-o. 38 39
18. Ammon, H.P.; Safayhi, H.; Mack, T.; Sabieraj, J. Mechanism of Antiinflammatory Actions of Curcumine and Boswellic Acids. *J. Ethnopharmacol.* **1993**, *38*, 113–119, doi:10.1016/0378-8741(93)90005-p. 40 41
19. Butenko, I.G.; Gladtschenko, S.V.; Galushko, S.V. Anti-Inflammatory Properties and Inhibition of Leukotriene C4 Biosynthesis in Vitro by Flavonoid Baicalein from Scutellaria Baicalensis Georgy Roots. *Agents Actions* **1993**, *39 Spec No*, C49–51, doi:10.1007/BF01972717. 42 43
20. Glaser, K.B.; Sung, A.; Bauer, J.; Weichman, B.M. Regulation of Eicosanoid Biosynthesis in the Macrophage. Involvement of Protein Tyrosine Phosphorylation and Modulation by Selective Protein Tyrosine Kinase Inhibitors. *Biochem. Pharmacol.* **1993**, *45*, 711–721, doi:10.1016/0006-2952(93)90147-o. 44 45
21. HOULT, J.R.S.; PANG, L. -H.; BLAND-WARD, P.A.; FORDER, R.A.; WILLIAMS, C.A.; HARBORNE, J.B. Inhibition of Leucocyte 5-Lipoxygenase and Cyclo-oxygenase but Not Constitutive Nitric Oxide Synthase by Tanetin, a Novel Flavonol Derived from Feverfew, Tanacetum Parthenium. *Pharm. Pharmacol. Commun.* **1995**, *1*, 71–74, doi:10.1111/j.2042-7158.1995.tb00394.x. 46 47 48
22. Kimura, Y.; Okuda, H.; Kubo, M. Effects of Stilbenes Isolated from Medicinal Plants on Arachidonate Metabolism and Degranulation in Human Polymorphonuclear Leukocytes. *J. Ethnopharmacol.* **1995**, *45*, 131–139, doi:10.1016/0378-8741(94)01206-f. 49 50
23. Hamasaki, Y.; Muro, E.; Miyanji, S.; Yamamoto, S.; Kobayashi, I.; Sato, R.; Zaitu, M.; Matsuo, M.; Ichimaru, T.; Tasaki, H.; et al. Inhibition of Leukotriene Synthesis by Honokiol in Rat Basophilic Leukemia Cells. *Int. Arch. Allergy Immunol.* **1996**, *110*, 278–281, doi:10.1159/000237299. 51 52
24. Dehmlow, C.; Erhard, J.; de Groot, H. Inhibition of Kupffer Cell Functions as an Explanation for the Hepatoprotective Properties of Silibinin. *Hepatol. Baltim. Md* **1996**, *23*, 749–754, doi:10.1053/jhep.1996.v23.pm0008666328. 53 54
25. Dehmlow, C.; Murawski, N.; de Groot, H. Scavenging of Reactive Oxygen Species and Inhibition of Arachidonic Acid Metabolism by Silibinin in Human Cells. *Life Sci.* **1996**, *58*, 1591–1600, doi:10.1016/0024-3205(96)00134-8. 55 56

26. Kohyama, N.; Nagata, T.; Fujimoto, S.; Sekiya, K. Inhibition of Arachidonate Lipoxygenase Activities by 2-(3,4-Dihydroxyphenyl)Ethanol, a Phenolic Compound from Olives. *Biosci. Biotechnol. Biochem.* **1997**, *61*, 347–350, doi:10.1271/bbb.61.347. 57 58
27. Petroni, A.; Blasevich, M.; Papini, N.; Salami, M.; Sala, A.; Galli, C. Inhibition of Leukocyte Leukotriene B<sub>4</sub> Production by an Olive Oil-Derived Phenol Identified by Mass-Spectrometry. *Thromb. Res.* **1997**, *87*, 315–322, doi:10.1016/s0049-3848(97)00133-3. 59 60
28. Yamazaki, R.; Aiyama, R.; Matsuzaki, T.; Hashimoto, S.; Yokokura, T. Anti-Inflammatory Effect of YPE-01, a Novel Diarylheptanoid Derivative, on Dermal Inflammation in Mice. *Inflamm. Res. Off. J. Eur. Histamine Res. Soc. Al* **1998**, *47*, 182–186, doi:10.1007/s000110050315. 61 62
29. Rotondo, S.; Rajtar, G.; Manarini, S.; Celardo, A.; Rotillo, D.; de Gaetano, G.; Evangelista, V.; Cerletti, C. Effect of Trans-Resveratrol, a Natural Polyphenolic Compound, on Human Polymorphonuclear Leukocyte Function. *Br. J. Pharmacol.* **1998**, *123*, 1691–1699, doi:10.1038/sj.bjp.0701784. 63 64
30. Müller, K.; Ziereis, K.; Paper, D.H. Ilex Aquifolium: Protection against Enzymatic and Non-Enzymatic Lipid Peroxidation. *Planta Med.* **1998**, *64*, 536–540, doi:10.1055/s-2006-957509. 65 66
31. Hiermann, A.; Schramm, H.W.; Laufer, S. Anti-Inflammatory Activity of Myricetin-3-O- $\beta$ -D-Glucuronide and Related Compounds. **1998**, *47*, 7. 67
32. de la Puerta, R.; Forder, R.A.; Hoult, J.R. Inhibition of Leukocyte Eicosanoid Generation and Radical Scavenging Activity by Gnaphalin, a Lipophilic Flavonol Isolated from *Helichrysum Picardii*. *Planta Med.* **1999**, *65*, 507–511, doi:10.1055/s-1999-14005. 68 69
33. de la Puerta, R.; Ruiz Gutierrez, V.; Hoult, J.R. Inhibition of Leukocyte 5-Lipoxygenase by Phenolics from Virgin Olive Oil. *Biochem. Pharmacol.* **1999**, *57*, 445–449, doi:10.1016/s0006-2952(98)00320-7. 70 71
34. Alanko, J.; Riutta, A.; Holm, P.; Mucha, I.; Vapaatalo, H.; Metsä-Ketelä, T. Modulation of Arachidonic Acid Metabolism by Phenols: Relation to Their Structure and Antioxidant/Prooxidant Properties. *Free Radic. Biol. Med.* **1999**, *26*, 193–201, doi:10.1016/s0891-5849(98)00179-8. 72 73
35. MacCarrone, M.; Lorenzon, T.; Guerrieri, P.; Agrò, A.F. Resveratrol Prevents Apoptosis in K562 Cells by Inhibiting Lipoxygenase and Cyclooxygenase Activity. *Eur. J. Biochem.* **1999**, *265*, 27–34, doi:10.1046/j.1432-1327.1999.00630.x. 74 75
36. Williams, C.A.; Harborne, J.B.; Geiger, H.; Hoult, J.R. The Flavonoids of *Tanacetum Parthenium* and *T. Vulgare* and Their Anti-Inflammatory Properties. *Phytochemistry* **1999**, *51*, 417–423, doi:10.1016/s0031-9422(99)00021-7. 76 77
37. Hamasaki, Y.; Kobayashi, I.; Zaitu, M.; Tsuji, K.; Kita, M.; Hayasaki, R.; Muro, E.; Yamamoto, S.; Matsuo, M.; Ichimaru, T.; et al. Magnolol Inhibits Leukotriene Synthesis in Rat Basophilic Leukemia-2H3 Cells. *Planta Med.* **1999**, *65*, 222–226, doi:10.1055/s-1999-13984. 78 79
38. Albert, D.; Zündorf, I.; Dingeramn, T.; Müller, W.E.; Steinhilber, D.; Werz, O. Hyperforin Is a Dual Inhibitor of Cyclooxygenase-1 and 5-Lipoxygenase. *Biochem. Pharmacol.* **2002**, *64*, 1767–1775, doi:10.1016/s0006-2952(02)01387-4. 80 81
39. Njamien, D. Anti-Inflammatory Activity of Erycristagallin, a Pterocarpene from *Erythrina Mildbraedii*. *Eur. J. Pharmacol.* **2003**, *468*, 67–74, doi:10.1016/S0014-2999(03)01664-9. 82 83

40. Hong, J.; Bose, M.; Ju, J.; Ryu, J.-H.; Chen, X.; Sang, S.; Lee, M.-J.; Yang, C.S. Modulation of Arachidonic Acid Metabolism by Curcumin and Related Beta-Diketone Derivatives: Effects on Cytosolic Phospholipase A(2), Cyclooxygenases and 5-Lipoxygenase. *Carcinogenesis* **2004**, *25*, 1671–1679, doi:10.1093/carcin/bgh165. 84  
85  
86
41. Njamien, D.; Mbafor, J.T.; Fomum, Z.T.; Kamanyi, A.; Mbanya, J.-C.; Recio, M.C.; Giner, R.M.; Máñez, S.; Ríos, J.L. Anti-Inflammatory Activities of Two Flavanones, Sigmoidin A and Sigmoidin B, from Erythrina Sigmoides. *Planta Med.* **2004**, *70*, 104–107, doi:10.1055/s-2004-815484. 87  
88
42. Prasad, N.S.; Raghavendra, R.; Lokesh, B.R.; Naidu, K.A. Spice Phenolics Inhibit Human PMNL 5-Lipoxygenase. *Prostaglandins Leukot. Essent. Fatty Acids* **2004**, *70*, 521–528, doi:10.1016/j.plefa.2003.11.006. 89  
90
43. Hsu, M.-F.; Lu, M.-C.; Tsao, L.-T.; Kuan, Y.-H.; Chen, C.-C.; Wang, J.-P. Mechanisms of the Influence of Magnolol on Eicosanoid Metabolism in Neutrophils. *Biochem. Pharmacol.* **2004**, *67*, 831–840, doi:10.1016/j.bcp.2003.09.040. 91  
92
44. Son, J.K.; Son, M.J.; Lee, E.; Moon, T.C.; Son, K.H.; Kim, C.-H.; Kim, H.P.; Kang, S.S.; Chang, H.W. Ginkgetin, a Biflavone from Ginkgo Biloba Leaves, Inhibits Cyclooxygenases-2 and 5-Lipoxygenase in Mouse Bone Marrow-Derived Mast Cells. *Biol. Pharm. Bull.* **2005**, *28*, 2181–2184, doi:10.1248/bpb.28.2181. 93  
94
45. Bas, E.; Recio, M.C.; Giner, R.M.; Máñez, S.; Cerdá-Nicolás, M.; Ríos, J.-L. Anti-Inflammatory Activity of 5- O -Demethylnobiletin, a Polymethoxyflavone Isolated from *Sideritis Tragoriganum*. *Planta Med.* **2006**, *72*, 136–142, doi:10.1055/s-2005-873191. 95  
96
46. Chen, D.-M.; Cai, X.; Kwik-Urbe, C.L.; Zeng, R.; Zhu, X.-Z. Inhibitory Effects of Procyanidin B(2) Dimer on Lipid-Laden Macrophage Formation. *J. Cardiovasc. Pharmacol.* **2006**, *48*, 54–70, doi:10.1097/01.fjc.0000242052.60502.21. 97  
98
47. Kim, J.S.; Kim, J.C.; Shim, S.H.; Lee, E.J.; Jin, W.; Bae, K.; Son, K.H.; Kim, H.P.; Kang, S.S.; Chang, H.W. Chemical Constituents of the Root of *Dystaenia Takeshimana* and Their Anti-Inflammatory Activity. *Arch. Pharm. Res.* **2006**, *29*, 617–623, doi:10.1007/BF02968244. 99  
100
48. Kim, S.J.; Jin, M.; Lee, E.; Moon, T.C.; Quan, Z.; Yang, J.H.; Son, K.H.; Kim, K.-U.; Son, J.K.; Chang, H.W. Effects of Methyl Gallate on Arachidonic Acid Metabolizing Enzymes: Cyclooxygenase-2 and 5-Lipoxygenase in Mouse Bone Marrow-Derived Mast Cells. *Arch. Pharm. Res.* **2006**, *29*, 874–878, doi:10.1007/BF02973908. 101  
102  
103
49. Son, M.J.; Moon, T.C.; Lee, E.K.; Son, K.H.; Kim, H.P.; Kang, S.S.; Son, J.K.; Lee, S.H.; Chang, H.W. Naturally Occurring Biflavonoid, Ochnaflavone, Inhibits Cyclooxygenases-2 and 5-Lipoxygenase in Mouse Bone Marrow-Derived Mast Cells. *Arch. Pharm. Res.* **2006**, *29*, 282–286, doi:10.1007/BF02968571. 104  
105
50. Raghavendra, H.; Diwakar, B.T.; Lokesh, B.R.; Naidu, K.A. Eugenol--the Active Principle from Cloves Inhibits 5-Lipoxygenase Activity and Leukotriene-C4 in Human PMNL Cells. *Prostaglandins Leukot. Essent. Fatty Acids* **2006**, *74*, 23–27, doi:10.1016/j.plefa.2005.08.006. 106  
107
51. Kalhan, R.; Smith, L.J.; Nlend, M.C.; Nair, A.; Hixon, J.L.; Sporn, P.H.S. A Mechanism of Benefit of Soy Genistein in Asthma: Inhibition of Eosinophil P38-Dependent Leukotriene Synthesis. *Clin. Exp. Allergy* **2007**, *0*, 071104193151002-???, doi:10.1111/j.1365-2222.2007.02862.x. 108  
109
52. Hernández, V.; Recio, M.C.; Máñez, S.; Giner, R.M.; Ríos, J.-L. Effects of Naturally Occurring Dihydroflavonols from *Inula Viscosa* on Inflammation and Enzymes Involved in the Arachidonic Acid Metabolism. *Life Sci.* **2007**, *81*, 480–488, doi:10.1016/j.lfs.2007.06.006. 110  
111

53. Park, S.; Han, S.-U.; Lee, K.-M.; Park, K.H.; Cho, S.W.; Hahm, K.-B. 5-LOX Inhibitor Modulates the Inflammatory Responses Provoked by Helicobacter Pylori Infection. *Helicobacter* **2007**, *12*, 49–58, doi:10.1111/j.1523-5378.2007.00469.x. 112 113
54. Moon, T.C.; Seo, C.S.; Haa, K.; Kim, J.C.; Hwang, N.K.; Hong, T.G.; Kim, J.H.; Kim, D.H.; Son, J.K.; Chang, H.W. Meso-Dihydroguaiaretic Acid Isolated from Saururus Chinensis Inhibits Cyclooxygenase-2 and 5-Lipoxygenase in Mouse Bone Marrow-Derived Mast Cells. *Arch. Pharm. Res.* **2008**, *31*, 606–610, doi:10.1007/s12272-001-1200-y. 114 115 116
55. Poeckel, D.; Greiner, C.; Verhoff, M.; Rau, O.; Tausch, L.; Hörnig, C.; Steinhilber, D.; Schubert-Zsilavecz, M.; Werz, O. Carnosic Acid and Carnosol Potently Inhibit Human 5-Lipoxygenase and Suppress pro-Inflammatory Responses of Stimulated Human Polymorphonuclear Leukocytes. *Biochem. Pharmacol.* **2008**, *76*, 91–97, doi:10.1016/j.bcp.2008.04.013. 117 118 119
56. Loke, W.M.; Proudfoot, J.M.; Stewart, S.; McKinley, A.J.; Needs, P.W.; Kroon, P.A.; Hodgson, J.M.; Croft, K.D. Metabolic Transformation Has a Profound Effect on Anti-Inflammatory Activity of Flavonoids Such as Quercetin: Lack of Association between Antioxidant and Lipoxygenase Inhibitory Activity. *Biochem. Pharmacol.* **2008**, *75*, 1045–1053, doi:10.1016/j.bcp.2007.11.002. 120 121 122
57. Anogianaki, A.; Castellani, M.L.; Madhappan, B.; Salini, V.; Vecchiet, J.; Tetè, S.; Frydas, S.; Perrella, A.; De Lutiis, M.A.; Neri, G.; et al. RANTES (CCL5) Potentiates Calcium Ionophore in the Production of LTB4 in Rat Adherent Macrophages from Granuloma Induced by KMnO4: Inhibition by NDGA. *Pharmacol. Res.* **2008**, *57*, 49–55, doi:10.1016/j.phrs.2007.11.002. 123 124 125
58. Castellani, M.L.; Conti, P.; Felaco, M.; Vecchiet, J.; Ciampoli, C.; Cerulli, G.; Boscolo, P.; Theoharides, T.C. Substance P Upregulates LTB4 in Rat Adherent Macrophages from Granuloma Induced by KMnO4. *Neurotox. Res.* **2009**, *15*, 49–56, doi:10.1007/s12640-009-9004-6. 126 127
59. Jin, M.-I.; Bae, K.-H.; Chang, H.-W.; Son, J.-K. Anti-Inflammatory Compounds from the Leaves of Ailanthus Altissima Meihua JIN. *Biomol. Ther.* **2009**, *17*, 86–91, doi:10.4062/biomolther.2009.17.1.86. 128 129
60. Feisst, C.; Pergola, C.; Rakonjac, M.; Rossi, A.; Koeberle, A.; Dodt, G.; Hoffmann, M.; Hoernig, C.; Fischer, L.; Steinhilber, D.; et al. Hyperforin Is a Novel Type of 5-Lipoxygenase Inhibitor with High Efficacy in Vivo. *Cell. Mol. Life Sci. CMLS* **2009**, *66*, 2759–2771, doi:10.1007/s00018-009-0078-3. 130 131
61. Lim, H.; Nam, J.W.; Seo, E.-K.; Kim, Y.S.; Kim, H.P. (-)-Nyasol (Cis-Hinokiresinol), a Norneolignan from the Rhizomes of Anemarrhena Asphodeloides, Is a Broad Spectrum Inhibitor of Eicosanoid and Nitric Oxide Production. *Arch. Pharm. Res.* **2009**, *32*, 1509–1514, doi:10.1007/s12272-009-2102-4. 132 133
62. Lim, H.; Son, K.H.; Bae, K.H.; Hung, T.M.; Kim, Y.S.; Kim, H.P. 5-Lipoxygenase-Inhibitory Constituents from Schizandra Fructus and Magnolia Flos. *Phytother. Res. PTR* **2009**, *23*, 1489–1492, doi:10.1002/ptr.2783. 134 135
63. Kim, J.M.; Lee, E.K.; Park, G.; Kim, M.K.; Yokozawa, T.; Yu, B.P.; Chung, H.Y. Morin Modulates the Oxidative Stress-Induced NF-KappaB Pathway through Its Anti-Oxidant Activity. *Free Radic. Res.* **2010**, *44*, 454–461, doi:10.3109/10715761003610737. 136 137
64. Saw, C.L.L.; Huang, Y.; Kong, A.-N. Synergistic Anti-Inflammatory Effects of Low Doses of Curcumin in Combination with Polyunsaturated Fatty Acids: Docosahexaenoic Acid or Eicosapentaenoic Acid. *Biochem. Pharmacol.* **2010**, *79*, 421–430, doi:10.1016/j.bcp.2009.08.030. 138 139

65. Lin, T.-Y.; London, C.A. Characterization and Modulation of Canine Mast Cell Derived Eicosanoids. *Vet. Immunol. Immunopathol.* **2010**, *135*, 118–127, doi:10.1016/j.vetimm.2009.11.010. 140 141
66. Lee, E.J.; Kim, J.S.; Kim, H.P.; Lee, J.-H.; Kang, S.S. Phenolic Constituents from the Flower Buds of *Lonicera Japonica* and Their 5-Lipoxygenase Inhibitory Activities. *Food Chem.* **2010**, *120*, 134–139, doi:10.1016/j.foodchem.2009.09.088. 142 143
67. Bhaskar, S.; Shalini, V.; Helen, A. Quercetin Regulates Oxidized LDL Induced Inflammatory Changes in Human PBMCs by Modulating the TLR-NF-KB Signaling Pathway. *Immunobiology* **2011**, *216*, 367–373, doi:10.1016/j.imbio.2010.07.011. 144 145
68. Kwon, O.S.; Choi, J.S.; Islam, Md.N.; Kim, Y.S.; Kim, H.P. Inhibition of 5-Lipoxygenase and Skin Inflammation by the Aerial Parts of *Artemisia Capillaris* and Its Constituents. *Arch. Pharm. Res.* **2011**, *34*, 1561–1569, doi:10.1007/s12272-011-0919-0. 146 147
69. Fan, S.-Y.; Zeng, H.-W.; Pei, Y.-H.; Li, L.; Ye, J.; Pan, Y.-X.; Zhang, J.-G.; Yuan, X.; Zhang, W.-D. The Anti-Inflammatory Activities of an Extract and Compounds Isolated from *Platycladus Orientalis* (Linnaeus) Franco in Vitro and Ex Vivo. *J. Ethnopharmacol.* **2012**, *141*, 647–652, doi:10.1016/j.jep.2011.05.019. 148 149
70. Lee, J.H.; Lee, D.U.; Kim, Y.S.; Kim, H.P. 5-Lipoxygenase Inhibition of the Fructus of *Foeniculum Vulgare* and Its Constituents. *Biomol. Ther.* **2012**, *20*, 113–117, doi:10.4062/biomolther.2012.20.1.113. 150 151
71. Han, Y.S.; Kim, M.-S.; Hwang, J.-K. Macelignan Inhibits Histamine Release and Inflammatory Mediator Production in Activated Rat Basophilic Leukemia Mast Cells. *Inflammation* **2012**, *35*, 1723–1731, doi:10.1007/s10753-012-9490-1. 152 153
72. Boudreau, L.H.; Maillet, J.; LeBlanc, L.M.; Jean-François, J.; Touaibia, M.; Flamand, N.; Surette, M.E. Caffeic Acid Phenethyl Ester and Its Amide Analogue Are Potent Inhibitors of Leukotriene Biosynthesis in Human Polymorphonuclear Leukocytes. *PloS One* **2012**, *7*, e31833, doi:10.1371/journal.pone.0031833. 154 155
73. Choi, Y.; Kim, M.S.; Hwang, J.-K. Inhibitory Effects of Panduratin A on Allergy-Related Mediator Production in Rat Basophilic Leukemia Mast Cells. *Inflammation* **2012**, *35*, 1904–1915, doi:10.1007/s10753-012-9513-y. 156 157
74. Kogut, M.H.; He, H.; Genovese, K.J. Bacterial Toll-like Receptor Agonists Induce Sequential NF-KB-Mediated Leukotriene B4 and Prostaglandin E2 Production in Chicken Heterophils. *Vet. Immunol. Immunopathol.* **2012**, *145*, 159–170, doi:10.1016/j.vetimm.2011.11.003. 158 159
75. Lim, J.C.; Park, S.Y.; Nam, Y.; Nguyen, T.T.; Sohn, U.D. The Protective Effect of Eupatilin against Hydrogen Peroxide-Induced Injury Involving 5-Lipoxygenase in Feline Esophageal Epithelial Cells. *Korean J. Physiol. Pharmacol. Off. J. Korean Physiol. Soc. Korean Soc. Pharmacol.* **2012**, *16*, 313–320, doi:10.4196/kjpp.2012.16.5.313. 160 161 162
76. Gomes, A.; Couto, D.; Alves, A.; Dias, I.; Freitas, M.; Porto, G.; Duarte, J.A.; Fernandes, E. Trihydroxyflavones with Antioxidant and Anti-Inflammatory Efficacy. *BioFactors Oxf. Engl.* **2012**, *38*, 378–386, doi:10.1002/biof.1033. 163 164
77. Li, L.; Zeng, H.; Shan, L.; Yuan, X.; Li, Y.; Liu, R.; Zhang, W. The Different Inhibitory Effects of Huang-Lian-Jie-Du-Tang on Cyclooxygenase 2 and 5-Lipoxygenase. *J. Ethnopharmacol.* **2012**, *143*, 732–739, doi:10.1016/j.jep.2012.07.037. 165 166

78. Werz, O.; Seegers, J.; Schaible, A.M.; Weinigel, C.; Barz, D.; Koeberle, A.; Allegrone, G.; Pollastro, F.; Zampieri, L.; Grassi, G.; et al. Cannflavins from Hemp Sprouts, a Novel Cannabinoid-Free Hemp Food Product, Target Microsomal Prostaglandin E2 Synthase-1 and 5-Lipoxygenase. *PharmaNutrition* **2014**, *2*, 53–60, doi:10.1016/j.phanu.2014.05.001. 167–169
79. Ribeiro, D.; Freitas, M.; Tomé, S.M.; Silva, A.M.S.; Porto, G.; Cabrita, E.J.; Marques, M.M.B.; Fernandes, E. Inhibition of LOX by Flavonoids: A Structure-Activity Relationship Study. *Eur. J. Med. Chem.* **2014**, *72*, 137–145, doi:10.1016/j.ejmech.2013.11.030. 170–171
80. Lee, Y.S.; Hur, S.; Kim, T.-Y. Homoisoflavanone Prevents Mast Cell Activation and Allergic Responses by Inhibition of Syk Signaling Pathway. *Allergy* **2014**, *69*, 453–462, doi:10.1111/all.12356. 172–173
81. Li, X.; Lu, Y.; Jin, Y.; Son, J.-K.; Lee, S.H.; Chang, H.W. Curcumin Inhibits the Activation of Immunoglobulin E-Mediated Mast Cells and Passive Systemic Anaphylaxis in Mice by Reducing Serum Eicosanoid and Histamine Levels. *Biomol. Ther.* **2014**, *22*, 27–34, doi:10.4062/biomolther.2013.092. 174–175
82. Kutil, Z.; Kvasnicova, M.; Temml, V.; Schuster, D.; Marsik, P.; Cusimamani, E.F.; Lou, J.-D.; Vanek, T.; Landa, P. Effect of Dietary Stilbenes on 5-Lipoxygenase and Cyclooxygenases Activities In Vitro. *Int. J. Food Prop.* **2015**, *18*, 1471–1477, doi:10.1080/10942912.2014.903416. 176–177
83. Forino, M.; Pace, S.; Chianese, G.; Santagostini, L.; Werner, M.; Weinigel, C.; Rummler, S.; Fico, G.; Werz, O.; Taglialatela-Scafati, O. Humudifucol and Bioactive Prenylated Polyphenols from Hops (*Humulus Lupulus* Cv. “Cascade”). *J. Nat. Prod.* **2016**, *79*, 590–597, doi:10.1021/acs.jnatprod.5b01052. 178–179
84. Tsen, S.Y.; Tan, X.Y.; Tan, Y.M.; Yan, B.Y.; Loke, W.M. Relative Inhibitions of 5-Lipoxygenase and Myeloperoxidase and Free-Radical Scavenging Activities of Daidzein, Dihydrodaidzein, and Equol. *J. Med. Food* **2016**, *19*, 543–548, doi:10.1089/jmf.2015.3557. 180–181
85. Roy, P.-P.; Faye, D.; Blanchard, S.; Cormier, M.; Doiron, J.A.; Surette, M.E.; Touaibia, M. New Caffeic Acid Phenylethyl Ester Analogs Bearing Substituted Triazole: Synthesis and Structure-Activity Relationship Study towards 5-Lipoxygenase Inhibition. *J. Chem.* **2017**, *2017*, e2380531, doi:10.1155/2017/2380531. 182–183
86. Anilkumar, K.; Reddy, G.V.; Azad, R.; Yarla, N.S.; Dharmapuri, G.; Srivastava, A.; Kamal, M.A.; Pallu, R. Evaluation of Anti-Inflammatory Properties of Isoorientin Isolated from Tubers of *Pueraria Tuberosa*. *Oxid. Med. Cell. Longev.* **2017**, *2017*, 1–10, doi:10.1155/2017/5498054. 184–185
87. Takasugi, M.; Muta, E.; Yamada, K.; Arai, H. A New Method to Evaluate Anti-Allergic Effect of Food Component by Measuring Leukotriene B4 from a Mouse Mast Cell Line. *Cytotechnology* **2018**, *70*, 177–184, doi:10.1007/s10616-017-0129-9. 186–187
88. Doucet, M.S.; Jougoux, J.-L.; Poirier, S.J.; Cormier, M.; Léger, J.L.; Surette, M.E.; Pichaud, N.; Touaibia, M.; Boudreau, L.H. Identification of Peracetylated Quercetin as a Selective 12-Lipoxygenase Pathway Inhibitor in Human Platelets. *Mol. Pharmacol.* **2019**, *95*, 139–150, doi:10.1124/mol.118.113480. 188–189
89. Mbarik, M.; Poirier, S.J.; Doiron, J.; Selka, A.; Barnett, D.A.; Cormier, M.; Touaibia, M.; Surette, M.E. Phenolic Acid Phenethyl esters and Their Corresponding Ketones: Inhibition of 5-Lipoxygenase and Stability in Human Blood and HepaRG Cells. *Pharmacol. Res. Perspect.* **2019**, *7*, e00524, doi:10.1002/prp2.524. 190–191
90. Storniolo, C.E.; Martínez-Hovelman, N.; Martínez-Huélamo, M.; Lamuela-Raventós, R.M.; Moreno, J.J. Extra Virgin Olive Oil Minor Compounds Modulate Mitogenic Action of Oleic Acid on Colon Cancer Cell Line. *J. Agric. Food Chem.* **2019**, *67*, 11420–11427, doi:10.1021/acs.jafc.9b04816. 192–193



91. Prabha, B.; Sini, S.; Priyadarshini, T.S.; Sasikumar, P.; Gopalan, G.; Joseph, J.P.; Jithin, M.M.; Sivan, V.V.; Jayamurthy, P.; Radhakrishnan, K.V. Anti-Inflammatory Effect and Mechanism of Action of Ellagic Acid-3,3',4'-Trimethoxy-4'-O- $\alpha$ -L-Rhamnopyranoside Isolated from *Hopea Parviflora* in Lipopolysaccharide-Stimulated RAW 264.7 Macrophages. *Nat. Prod. Res.* **2019**, 1–5, doi:10.1080/14786419.2019.1690486.
92. Gerstmeier, J.; Seegers, J.; Witt, F.; Waltenberger, B.; Temml, V.; Rollinger, J.M.; Stuppner, H.; Koeberle, A.; Schuster, D.; Werz, O. Ginkgolic Acid Is a Multi-Target Inhibitor of Key Enzymes in Pro-Inflammatory Lipid Mediator Biosynthesis. *Front. Pharmacol.* **2019**, 10, 797, doi:10.3389/fphar.2019.00797.
93. Hartung, N.M.; Fischer, J.; Ostermann, A.I.; Willenberg, I.; Rund, K.M.; Schebb, N.H.; Garscha, U. Impact of Food Polyphenols on Oxylipin Biosynthesis in Human Neutrophils. *Biochim. Biophys. Acta Mol. Cell Biol. Lipids* **2019**, 1864, 1536–1544, doi:10.1016/j.bbalip.2019.05.002.
94. Jin, S.E.; Ha, H.; Shin, H.-K.; Seo, C.-S. Anti-Allergic and Anti-Inflammatory Effects of Kuwanon G and Morusin on MC/9 Mast Cells and HaCaT Keratinocytes. *Mol. Basel Switz.* **2019**, 24, E265, doi:10.3390/molecules24020265.
95. Pan, S.; Zhao, X.; Ji, N.; Shao, C.; Fu, B.; Zhang, Z.; Wang, R.; Qiu, Y.; Jin, M.; Kong, D. Inhibitory Effect of Taxifolin on Mast Cell Activation and Mast Cell-Mediated Allergic Inflammatory Response. *Int. Immunopharmacol.* **2019**, 71, 205–214, doi:10.1016/j.intimp.2019.03.038.
96. Giménez-Bastida, J.A.; González-Sarrias, A.; Espín, J.C.; Schneider, C. Inhibition of 5-Lipoxygenase-Derived Leukotrienes and Hemiketals as a Novel Anti-Inflammatory Mechanism of Urolithins. *Mol. Nutr. Food Res.* **2020**, 64, e2000129, doi:10.1002/mnfr.202000129.
97. Habib, E.S.; El-Bsoumy, E.; Ibrahim, A.K.; Helal, M.A.; El-Magd, M.A.; Ahmed, S.A. Anti-Inflammatory Effect of Methoxyflavonoids from *Chiliadenus Montanus* (*Jasonia Montana*) Growing in Egypt. *Nat. Prod. Res.* **2020**, 1–5, doi:10.1080/14786419.2020.1802272.
98. Gilbert, N.C.; Gerstmeier, J.; Schexnaydre, E.E.; Börner, F.; Garscha, U.; Neau, D.B.; Werz, O.; Newcomer, M.E. Structural and Mechanistic Insights into 5-Lipoxygenase Inhibition by Natural Products. *Nat. Chem. Biol.* **2020**, 16, 783–790, doi:10.1038/s41589-020-0544-7.
99. Mostafa, E.S.; Nawwar, M.A.M.; Mostafa, D.A.; Ragab, M.F.; Swilam, N. Karafsin, a Unique Mono-Acylated Flavonoid Apiofurnoside from the Leaves of *Apium Graveolens* Var. *Secalinum Alef*: In Vitro and in Vivo Anti-Inflammatory Assessment. *Ind. Crops Prod.* **2020**, 158, 112901, doi:10.1016/j.indcrop.2020.112901.
100. Lee, J.-Y.; Park, S.-H.; Jhee, K.-H.; Yang, S.-A. Tricin Isolated from Enzyme-Treated *Zizania Latifolia* Extract Inhibits IgE-Mediated Allergic Reactions in RBL-2H3 Cells by Targeting the Lyn/Syk Pathway. *Mol. Basel Switz.* **2020**, 25, E2084, doi:10.3390/molecules25092084.
101. Toda, K.; Tsukayama, I.; Nagasaki, Y.; Konoike, Y.; Tamenobu, A.; Ganeko, N.; Ito, H.; Kawakami, Y.; Takahashi, Y.; Miki, Y.; et al. Red-Kerneled Rice Proanthocyanidin Inhibits Arachidonate 5-Lipoxygenase and Decreases Psoriasis-like Skin Inflammation. *Arch. Biochem. Biophys.* **2020**, 689, 108307, doi:10.1016/j.abb.2020.108307.
